1 *Original Research*

2 Immunomodulatory activity of *Ganoderma lucidum* immunomodulatory  
3 protein *via* PI3K/Akt and MAPK signaling pathways in macrophage  
4 RAW264.7 cells

5

6 Qi-Zhang Li,<sup>a,b</sup> Yu-Zhou Chang,<sup>c</sup> Liu-Ding-Ji Li,<sup>b</sup> Xiao-Yu Du,<sup>b</sup> Xiao-Hui Bai,<sup>b</sup>  
7 Zhu-Mei He,<sup>a\*</sup> Lei Chen,<sup>c\*</sup> Xuan-Wei Zhou,<sup>b\*</sup>

8

9 <sup>a</sup>Guangdong Provincial Key Laboratory for Aquatic Economic Animals, School of  
10 Life Sciences, Sun Yat-sen University, Guangzhou, People's Republic of China

11 <sup>b</sup>School of Agriculture and Biology, and Engineering Research Center of Therapeutic  
12 Antibody (Ministry of Education), Shanghai Jiao Tong University, Shanghai, People's  
13 Republic of China

14 <sup>c</sup>Center for Microbiota and Immunological Diseases, Shanghai General Hospital,  
15 Shanghai Institute of Immunology, School of Medicine, Shanghai Jiao Tong  
16 University, Shanghai, People's Republic of China

17

18 *Running title:* Immunomodulatory activity of *G. lucidum* FIP

19

---

20 \*Corresponding authors: Prof. Xuan-Wei Zhou, No. 1-411# Agriculture and Biology Building, 800  
21 Dongchuan Road, Shanghai Jiao Tong University, Shanghai 200240, People's Republic of China. Tel.  
22 & Fax.: +86-21-34205778, E-mail: xuanweizhou@sjtu.edu.cn; Prof. Lei Chen, E-mail:  
23 lei.chen@sjtu.edu.cn. Prof. Zhu-Mei He, School of Life Sciences, Sun Yat-sen University, Guangzhou,  
24 People's Republic of China. Tel. & Fax.: +86-020-84113065, E-mail: lsshezm@mail.sysu.edu.cn.

25

26 ABSTRACT

27 *Ganoderma lucidum*, a traditional edible and medicinal fungus, holds an important  
28 status in health care systems in China and other Asian countries. Fungal  
29 immunomodulatory protein (FIP), one of the active ingredients isolated from *G.*  
30 *lucidum*, is a class of naturally occurring proteins and possesses potential biological  
31 functions. This study was conducted to explore the molecular mechanism of its  
32 immunomodulatory potency in immune responses of macrophages. *In vitro* assays of  
33 biological activity indicated that rFIP-glu significantly activated macrophage  
34 RAW264.7 cells, and possessed the ability of pro- and anti-inflammation the cells.  
35 RNA sequencing analysis showed that macrophage activation involved Toll-like  
36 receptors and mitogen-activated protein kinases pathways. Furthermore, qRT-PCR  
37 indicated that phosphoinositide 3 kinase inhibitor LY294002 blocked the mRNA  
38 levels of MCP-1, MEK1/2 inhibitor U0126 reduced the mRNA levels of TNF- $\alpha$  and  
39 MCP-1, and JNK inhibitor SP600125 prevented the up-regulation of iNOS mRNA in  
40 the rFIP-glu-induced cells. FIP-glu mediated these inflammatory effects not through a  
41 general pathway, instead through a different pathway for different inflammatory  
42 mediator. These data indicate the possibility that rFIP-glu has an important  
43 immune-regulation function and thus has potential therapeutic uses.

44 KEYWORDS

45 *Ganoderma lucidum* immunomodulatory protein (FIP-glu); immunomodulatory; RNA  
46 sequencing (RNA-seq); mitogen-activated protein kinases (MAPK); phosphoinositide  
47 3 kinase (PI3K)

48 *Ganoderma lucidum*, a traditional Chinese medicinal mushroom, is a species in  
49 the genus of *Ganoderma* with numerous pharmacological effects such as improving  
50 immune function, antitumor, antioxidant, reducing cardiovascular and cerebrovascular  
51 diseases and heart diseases caused by body oxidation (1). Among more than 400  
52 different bioactive compounds isolated from *G. lucidum*, fungal immunomodulatory  
53 protein (FIP) is an important bioactive component with immune regulating activity  
54 and is one of the most promising active ingredients developed by modern  
55 biotechnologies (2). FIP is a small protein with similar structure and  
56 immune-regulatory activity to phytohemagglutinin and immunoglobulins. Since the  
57 first FIP (designated as Lingzhi-8 or LZ-8) was isolated from *G. lucidum* mycelia,  
58 dozens of FIPs have been isolated and identified from different fungus species in  
59 recent years (3-6). FIPs have immunomodulatory functions and play an important role  
60 in anti-tumor, anti-allergy, anti-transplant rejection, *etc.*, which implies a promising  
61 application for medicinal use (7). For example, FIPs suppress tumors by inhibition of  
62 telomerase activity *via* decrease of *hTERT* promoter activity and translocation of its  
63 protein (8-10). FIP-gmi induce apoptosis *via*  $\beta$ -catenin inhibition in lung cancer cells  
64 (11). FIP-fve has anti-inflammatory effects on OVA-induced airway inflammation and  
65 reduces airway remodeling by suppressing IL-17 (12). In spite of a few studies about  
66 anti-tumor (13, 14) and immunomodulatory effects (15-17), the mechanism of these  
67 activities remain unclear. The relationship between the activation of these proteins,  
68 downstream cytokine expression and physiological function represents an active line  
69 of investigation.

70 Macrophages, belonging to a group of mononuclear phagocytes, play vital roles  
71 in processes of the immune response and are strategically positioned throughout the  
72 body tissues (18). They possess functions of phagocytosis, antigen presentation and  
73 production of cytokines, thereby initiating immune response (19). Following  
74 activation, macrophages can release a wide array of pro- or anti-inflammatory  
75 cytokines, which further activate fellow immune cells (20). Depending on these  
76 signals, macrophages have been typed classically activated (pro-inflammation, M1)  
77 and alternatively activated (anti-inflammation, M2) (21). Classically activated  
78 macrophages are elicited in response to pro-inflammatory cytokines and  
79 pathogen-associated molecular patterns (PAMPs), such as Interferon- $\gamma$  (IFN- $\gamma$ ) and  
80 lipopolysaccharide (LPS) to promote pathogen killing and chronic inflammation. (22,  
81 23). These macrophages produce cytotoxic and inflammatory molecules nitric oxide  
82 (NO) and reactive oxygen species (ROS), pro-inflammatory cytokines tumor necrosis  
83 factor (TNF- $\alpha$ ), interleukin (IL)-1 $\beta$  and IL-6, chemokine monocyte chemoattractant  
84 protein-1 (MCP-1, or C-C motif ligand 2 (CCL-2)), *etc.* (24). However, excessive  
85 inflammatory mediators can be implicated in a number of chronic diseases, such as  
86 arthritis, colitis and asthma (25). M2 macrophages, which are typed in response to  
87 anti-inflammatory cytokines, parasitic infections and damage-associated molecular  
88 patterns (DAMPs), such as IL-4 and IL-13, play an important role in inhibition of  
89 chronic and acute inflammatory response and in tissue repair (23). M2 macrophages  
90 are able to secrete high amounts of anti-inflammatory cytokines, such as IL-10 and  
91 TGF- $\beta$  (26).

92 Macrophages can be activated to an inflammation-promoting phenotype through  
93 members of the Toll-like receptor (TLR) family such as TLR4 (20, 27, 28). Activated  
94 TLRs induce activation of specific intracellular pathways including phosphoinositide  
95 3 kinases (PI3K/Akt), mitogen activated protein kinases (MAPKs) and nuclear factor  
96 kappa B (NF- $\kappa$ B) (21, 29, 30). PI3K/Akt signaling pathway participates in  
97 macrophage polarization (31-34), while MAPKs, including extracellular  
98 signal-related kinase (ERK)-1/2, p38 and c-Jun NH<sub>2</sub>-terminal kinase (JNK), and  
99 NF- $\kappa$ B are classic inflammation related signals and induce the expression of  
100 pro-inflammatory mediators (35-38).

101 Here, we report that rFIP-glu produced in *Pichia pastoris* has the ability to induce  
102 macrophage activation and produce pro- and anti-inflammatory mediators, which may  
103 be through PI3K and MAPK pathways.

104

## 105 RESULTS

106 **Production of rFIP-glu in *Pichia pastoris*.** An expression vector pPIC9K  
107 was used for achieving rFIP-glu. To facilitate purification, a His-tag was added at the  
108 C-terminal of rFIP-glu (Fig. 1A). Following confirmation by sequencing and  
109 linearization by *Sac I*, a recombination plasmid containing nucleotide sequences of  
110 FIP-glu and His-tag was transformed into *Pichia pastoris* GS115 cells. The  
111 transformants successfully secreted recombination proteins into the media compared  
112 with the negative control (GS115 transformed with or without pPIC9K plasmid  
113 incubated with or without MeOH) after induced by MeOH for 72 h (Fig. 1B). Western

114 blot analysis further confirmed that the secreted protein was rFIP-glu using anti-6×His  
115 tag (Fig. 1C) and anti-rFIP-glu (Fig. 1D).

116

117 **Toxicity of rFIP-glu against RAW264.7 cells.** To investigate the activation  
118 effect of rFIP-glu on the RAW264.7 cells, firstly we determined whether this  
119 recombinant fungal protein possessed toxicity and measured its noncytotoxic range.  
120 As shown in Fig. 2, the proliferation of RAW265.7 cells treated with 1 and 2 µg/mL  
121 of rFIP-glu significantly increased ( $p \leq 0.0001$ ), relative to the control group. A  
122 culture of RAW264.7 cells incubated with 4 µg/mL of rFIP-glu resulted in no effect  
123 on cell viability and more than 90% of cells with 8 µg/mL were viable ( $p \leq 0.01$ ). The  
124 viability of RAW264.7 cells with more than 8 µg/mL showed a rapid decrease ( $p \leq$   
125 0.0001). Based on these results, subsequent assays were performed at 4 µg/mL or no  
126 more than 8 µg/mL. Additionally, rFIP-glu obviously influenced the morphology of  
127 RAW264.7 macrophages with or without stimulation of LPS (Fig. S1).

128

129 **rFIP-glu improves phagocytosis of RAW264.7 cells.** Next, phagocytic  
130 activities of RAW264.7 cells treated with rFIP-glu were examined by neutral red  
131 uptake assay. As shown in Fig. 3, when the cells were treated with noncytotoxic  
132 concentration of rFIP-glu ranged from 1 to 8 µg/mL, the phagocytosis increased and  
133 then decreased. The phagocytosis of macrophage RAW264.7 cells were significantly  
134 improved ( $p \leq 0.05$ ) at 2 µg/mL of rFIP-glu, but suppressed ( $p > 0.05$ ) at 8 µg/mL.  
135 These indicate that rFIP-glu has the ability to enhance phagocytic activity of RAW

136 264.7 cells when the concentration is no higher than 8  $\mu\text{g}/\text{mL}$ .

137

138 **rFIP-glu regulates pro- and anti-inflammatory genes at**

139 **transcriptional level in RAW264.7 cells.** To further evaluate the

140 immunostimulatory effects of rFIP-glu, we investigated whether rFIP-glu had the

141 ability to induce mRNA levels of relevant genes contributing to the function of

142 macrophages. These genes were determined by qRT-PCR after cells were treated with

143 rFIP-glu (1, 2, 4 and 8  $\mu\text{g}/\text{mL}$ ) for 6 h (Fig. 4). Compared to control, the

144 rFIP-glu-treated group showed a robust increase in the mRNA level of TNF- $\alpha$  (Fig.

145 4A;  $p \leq 0.01$  at 1  $\mu\text{g}/\text{mL}$ ;  $p \leq 0.001$  at 2, 4 and 8  $\mu\text{g}/\text{mL}$ ). Similarly, rFIP-glu also

146 significantly promoted the mRNA expression of Arginase II in a

147 concentration-dependent manner (Fig. 4B;  $p \leq 0.001$  at 1  $\mu\text{g}/\text{mL}$ ;  $p \leq 0.0001$  at 2, 4

148 and 8  $\mu\text{g}/\text{mL}$ ). The production of NO was measured firstly, but none was detected at 1

149 to 8  $\mu\text{g}/\text{mL}$  of rFIP-glu (Data not shown). Alternatively, we investigated the mRNA

150 expression of iNOS and found that it also dramatically increased in a

151 concentration-dependent manner (Fig. 4C;  $p \leq 0.0001$  at 4 and 8  $\mu\text{g}/\text{mL}$ ). The mRNA

152 level of MCP-1 (CCL-2) was also increased and peaked at 2  $\mu\text{g}/\text{mL}$  ( $p \leq 0.0001$ ), and

153 then decreased to no change at 8  $\mu\text{g}/\text{mL}$  compared with control (Fig. 4D). rFIP-glu

154 treatment concentration-dependently inhibited the mRNA expression levels of IL-10

155 (Fig. 4E;  $p \leq 0.0001$ ) in RAW264.7 cells. These results exhibit that rFIP-glu

156 stimulates the immune responses by inducing pro-inflammatory mediators. In parallel,

157 rFIP-glu inhibited the mRNA expression level of CXCL-10 (Fig. 4F;  $p \leq 0.01$  at 1

158  $\mu\text{g/mL}$ ;  $p \leq 0.0001$  at 2, 4 and 8  $\mu\text{g/mL}$ ). This result exhibits that rFIP-glu induces  
159 anti-inflammatory phenotype of macrophages. Additionally, there was little or no  
160 effect on IL-6 at transcriptional level (Fig. 4G) and the mRNA expression of IL-1 $\beta$   
161 was not detected (Data not shown). Taken together, rFIP-glu re-polarizes  
162 macrophages by regulating of pro- and anti-inflammatory genes expression at  
163 transcriptional level in RAW264.7 cells.

164

165 **rFIP-glu regulates LPS-induced pro- and anti-inflammatory**  
166 **mediators at transcriptional level in RAW264.7 cells.** In order to further  
167 determine that rFIP-glu induces or suppresses mRNA expression levels of pro- and  
168 anti-inflammatory genes, RAW264.7 cells were stimulated with 1  $\mu\text{g/mL}$  LPS in the  
169 presence or absence of increasing concentration of rFIP-glu for 6 h, and then  
170 qRT-PCR analysis was performed. Compared with the normal control group, LPS  
171 treatment (1  $\mu\text{g/mL}$ ) significantly increased the mRNA expression of IL-1 $\beta$ , IL-6,  
172 IL-10, TNF- $\alpha$ , MCP-1 (CCL-2), CXCL-10 and Arginase II and production of NO (Fig.  
173 5). rFIP-glu treatment (1, 2, 4 and 8  $\mu\text{g/mL}$ ) significantly promoted the mRNA levels  
174 of TNF- $\alpha$  (Fig. 5A;  $p \leq 0.0001$ ), MCP-1 (CCL-2) (Fig. 5B;  $p \leq 0.0001$ ) and Arginase  
175 II (Fig. 5C;  $p \leq 0.0001$ ) and concentration-dependently inhibited IL-10 expression at  
176 transcriptional level (Fig. 5D;  $p \leq 0.001$  at 2  $\mu\text{g/mL}$ ;  $p \leq 0.0001$  at 4 and 8  $\mu\text{g/mL}$ ) in  
177 LPS-stimulated RAW 264.7 cells. These results suggest that rFIP-glu promotes  
178 inflammation in LPS-induced RAW264.7. On the other hand, rFIP-glu could  
179 suppressed LPS-induced mRNA expression levels of IL-1 $\beta$  (Fig. 5E;  $p \leq 0.01$  at 2



180  $\mu\text{g}/\text{mL}$ ;  $p \leq 0.0001$  at 4 and 8  $\mu\text{g}/\text{mL}$ ), IL-6 (Fig. 5F;  $p \leq 0.01$  at 4  $\mu\text{g}/\text{mL}$ ;  $p \leq 0.0001$   
181 at 8  $\mu\text{g}/\text{mL}$ ) and CXCL-10 (Fig. 5G;  $p \leq 0.01$  at 4  $\mu\text{g}/\text{mL}$ ;  $p \leq 0.0001$  at 8  $\mu\text{g}/\text{mL}$ ) and  
182 LPS-induced production of NO (Fig. 5H;  $p \leq 0.01$  at 2  $\mu\text{g}/\text{mL}$ ;  $p \leq 0.0001$  at 4 and 8  
183  $\mu\text{g}/\text{mL}$ ) in a concentration-dependent manner. The results indicate that rFIP-glu  
184 suppresses the LPS-induced expression of these inflammatory mediators at the  
185 transcriptional level. Thus, rFIP-glu regulates pro- and anti-inflammatory genes  
186 expression at transcriptional level in LPS-stimulated RAW264.7 cells.

187

188 **RNA sequencing results.** To give further insights into the molecular  
189 mechanisms involved in the activity of rFIP-glu on macrophage RAW264.7 cells,  
190 RNA-seq was performed at the sequencing core facility of Shanghai Institute of  
191 Immunology. RAW264.7 cells were exposed to non-toxic rFIP-glu doses (4  $\mu\text{g}/\text{mL}$ )  
192 for 6 h (Fig. 6). There were approximately 50,000 (coding and non-coding) genes  
193 detected. To determine sample relationships, principle component analysis (PCA) (Fig.  
194 6A) and hierarchical clustering analysis (Heatmap) (Fig. 6B) were performed and  
195 demonstrated that two different groups, rFIP-glu treatment group and control (PBS)  
196 group, can be distinguished and showed segregation. Using an FDR  $\leq 0.001$  and fold  
197 change  $> 1$  to determine differently expressed genes after rFIP-glu treatment, more  
198 than 700 genes were differentially expressed and we observed 578 up-regulated genes  
199 and 159 down-regulated gene (Fig. 6C). Next, we used the Gene Ontology (GO)  
200 database to characterize the differentially expressed genes. Subsets of these genes  
201 were found to be involved in cellular process, regulation of biological process,

202 metabolic process, response to stimulus, developmental process, signaling and  
203 localization (Fig. 6D). These genes encoded proteins that perform immunological  
204 functions including inflammatory response, response to oxygen-containing compound,  
205 cellular response to organonitrogen compound, regulation of protein phosphorylation,  
206 regulation of protein modification process and regulation of programmed cell death  
207 (Fig. 6E). Moreover, to investigate the possible signaling pathways through which  
208 RAW264.7 cells activated by rFIP-glu, Kyoto Encyclopedia of Genes and Genomes  
209 (KEGG) pathway enrichment analysis was performed. Fig. 6F showed the top 20  
210 significantly enriched canonical pathways. In order to verify the RNA-seq results, 10  
211 differential expression genes which were up- or down-regulated showed in the  
212 RNA-seq results were selected. The expression levels of these genes measured by  
213 RT-qPCR showed the same tendency with RNA-seq (Fig. 6G).

214

215 **PI3K and MAPK signaling pathways are involved in rFIP-glu-induced**  
216 **macrophage activation.** Obviously, results mentioned above had been shown that  
217 rFIP-glu was capable to promote macrophage proliferation and phagocytosis and  
218 induce the mRNA expression of inflammatory mediators such as TNF- $\alpha$ , MCP-1  
219 (CCL-2) and iNOS. Analysis of RNA-seq indicated that Toll-like receptors pathway  
220 was involved in macrophage activation by rFIP-glu (Fig. S2). Signaling pathway  
221 inhibitor, PI3K inhibitor LY294002, was used to further confirm the mechanisms  
222 involved in rFIP-glu-induced macrophage activation. mRNA levels of TNF- $\alpha$ , MCP-1  
223 (CCL-2) and iNOS were measure by qRT-PCR. Results showed that PI3K inhibitor

224 LY294002 blocked the mRNA levels of MCP-1 (CCL-2) induced by rFIP-glu in  
225 RAW264.7 cells (Fig. 7B;  $p \leq 0.0001$ ), while the mRNA expression of TNF- $\alpha$  was not  
226 changed (Fig. 7A). These findings suggest that the PI3K pathway is related to  
227 rFIP-glu-induced macrophage activation.

228 RNA-seq data implied that MAPK signaling pathway was also involved in  
229 macrophage activation by rFIP-glu (Fig. S3). Signaling pathway inhibitors, MEK1/2  
230 inhibitor U0126, JNK inhibitor SP600125 and p38 inhibitor SB203580, were used to  
231 further confirm the mechanisms involved in rFIP-glu-induced macrophage activation.  
232 mRNA levels of TNF- $\alpha$ , MCP-1 (CCL-2) and iNOS were measure by qRT-PCR.  
233 Results showed that, in rFIP-glu-induced RAW264.7, MEK1/2 inhibitor U0126  
234 blocked the mRNA levels of TNF- $\alpha$  (Fig. 7C;  $p \leq 0.0001$ ) and MCP-1 (CCL-2) (Fig.  
235 7D;  $p \leq 0.0001$ ) and JNK inhibitor SP600125 prevented the up-regulation of iNOS  
236 mRNA (Fig. 7E;  $p \leq 0.001$ ). These findings suggest that the MEK1/2 and JNK  
237 pathways are indeed related to rFIP-glu-induced macrophage activation.

238

## 239 Discussion

240 *G. lucidum* is well known as an edible medicinal mushroom for thousands of  
241 years in China. FIP-glu or LZ-8 is one of the active ingredients in *G. lucidum*. From  
242 beginning of discovery, FIP-glu is named immunomodulatory protein because of a  
243 certain degree of homology with the heavy chain variable region of several  
244 immunoglobulins (39, 40). FIP-glu possesses a variety of physiological activities,  
245 such as anti-anaphylaxis, proliferation stimulation of lymphocytes, anti-tumor and

246 immunosuppression (7), suggesting that this protein has great potential in  
247 development of immuno-regulated drugs or foods. Our results showed that rFIP-glu is  
248 a potent stimulator of macrophage proliferation and activation. rFIP-glu can regulate  
249 the mRNA expression of pro- and anti-inflammatory mediators in macrophage  
250 RAW264.7 cells in the presence or absence of LPS. rFIP-glu mediates macrophage  
251 activation through PI3K and MAPK pathways based on RNA-seq analysis.

252 Macrophages play an important role in host-defense. Macrophages perform  
253 phagocytosis against pathogens as the first step, which is used to initiate the innate  
254 immune response, and then orchestrate the adaptive response (41). Thus, phagocytosis  
255 is a key indicator of evaluating macrophage activation. In the present study, rFIP-glu  
256 significantly improved the phagocytosis of macrophage RAW264.7 cells at 2 µg/mL,  
257 suggesting that rFIP-glu have abilities to enhance phagocytic activity of RAW 264.7  
258 cells. The phagocytosis of macrophages can be enhanced by many bioactive  
259 substances, such as polysaccharides (42, 43), peptides (44) and proteins (45, 46),  
260 alkaloids (47) and phospholipids (48). Phagocytosis is one of the important innate  
261 immune responses. Following RNA-seq analysis showed that rFIP-glu-induced  
262 phagocytosis of macrophage RAW264.7 cells involved Fcγ receptor-mediated  
263 phagocytosis and most genes involved in this process were up-regulated (Fig. S4).  
264 There are two general classes of Fcγ receptors (FcγRs), activating receptors that  
265 activate effector functions and inhibitory receptors that inhibit these functions (41). In  
266 general, activation and inhibitory FcγRs are co-expressed on the same cell (49). The  
267 phagocytosis involves the simultaneous clustering of activating and inhibitory FcγRs

268 and is regulated by the ratio of activating to inhibitory Fc $\gamma$ Rs (50). Moreover,  
269 Fc $\gamma$ R-mediated phagocytosis is accompanied by the release of inflammatory  
270 mediators, and excessive magnitude of the Fc $\gamma$ R response could lead to excessive  
271 inflammation (50, 51). RNA-seq analysis exhibited down-regulation of an activating  
272 receptor, Fc $\gamma$ RI and up-regulation of an inhibitory receptor, Fc $\gamma$ RIIb, when  
273 RAW264.7 cells were treated with 4  $\mu$ g/mL of rFIP-glu although the enhancement of  
274 phagocytosis was not significant. This suggests that rFIP-glu participates in the  
275 regulation of the phagocytosis of macrophages and the release of inflammatory  
276 mediators. Additionally, Fc $\gamma$ RIIb has ability to suppress allergic responses (52-55).  
277 This possibly is one of the mechanisms of rFIP-glu-mediated anti-allergy.

278 In response to an immune challenge, macrophages become activated and produce  
279 cytotoxic and inflammatory mediators, such as NO, ROS, TNF- $\alpha$  and IL-6, that  
280 contribute to nonspecific immunity (56). Our results implied that rFIP-glu has the  
281 predominant role in transcription of pro-inflammatory genes including TNF- $\alpha$ ,  
282 MCP-1 (CCL-2), Arginase II and iNOS. Macrophages can be activated by  
283 biologically active substances such as polysaccharides and proteins to produce the  
284 pro-inflammatory molecules (24, 34, 57, 58). Similarly, most mushroom metabolites  
285 also activate macrophages to produce various mediators, such as IL-1 $\beta$ , TNF- $\alpha$  and  
286 iNOS (59). PCP, an immunomodulatory protein from *Poria cocos*, can promote  
287 TNF- $\alpha$  and IL-1 $\beta$  production in RAW 264.7 cells (60). TNF- $\alpha$  are pro-inflammatory  
288 cytokines and play an essential role in the immune response and inflammation (61).  
289 MCP-1 (CCL-2) is a member of the CC chemokine family and involved in the

290 pathogenesis of multiple forms of inflammatory disorders as a mediator of acute and  
291 chronic inflammation (62, 63). Arginase II, one of isoforms of arginase, is  
292 up-regulated in M1 macrophages by pro-inflammatory stimuli and promotes  
293 pro-inflammatory responses (64, 65). iNOS-dependent nitric oxide from activated  
294 macrophages as a cytotoxic mediator can function in many diseases including cancer  
295 (66). Interestingly, in rFIP-glu-treated macrophage RAW264.7 cells, the mRNA  
296 expression of IL-6 was not changed, and that of IL-1 $\beta$  was not detected due to less  
297 transcripts possibly (Data not shown), although IL-1 $\beta$  and IL-6 are important  
298 pro-inflammatory cytokines as well. Moreover, the mRNA level of IL-10 was  
299 suppressed by rFIP-glu. IL-10 is an anti-inflammation cytokine and is secreted by M2  
300 macrophages to suppress the inflammation (26, 67). Studies show that an increase in  
301 levels of M1 markers such as IL-1 $\beta$ , MCP-1 (CCL-2), TNF- $\alpha$  and iNOS and a  
302 decrease or little change in levels of M2 markers such as IL-10 will drive macrophage  
303 M1 activation (68-71). The findings of the present investigation contributed to our  
304 understanding that rFIP-glu promotes macrophage M1 polarization and initiates  
305 pro-inflammatory responses. Unexpectedly, CXCL-10 were down-regulated at mRNA  
306 levels in RAW264.7 cells induced by rFIP-glu. CXCL-10, belonging to the CXC  
307 family of chemokines, is involved in systemic inflammation and can mediate the  
308 recruitment of inflammatory cells (72, 73). Actually, CXCL-10 are expressed under  
309 inflammatory conditions in M1 macrophages (74, 75) and their products are reduced  
310 in M2 macrophages (76, 77). It seems that rFIP-glu induces M2 phenotypical  
311 macrophages to suppress inflammation. To further confirm anti-inflammatory effects

312 of rFIP-glu, these related genes were detected in LPS-stimulated macrophage  
313 RAW264.7 cells. Results showed that rFIP-glu indeed possessed anti-inflammation  
314 activity through inhibiting LPS-induced mRNA levels of pro-inflammatory mediators  
315 (IL-6, IL-1 $\beta$  and CXCL-10) and the production of NO. A vast majority of bioactive  
316 substances can attenuate LPS-induced inflammation by decreasing the mRNA levels  
317 of pro-inflammatory mediators and increasing anti-inflammatory mediators.  
318 Polysaccharides, SGP-1 and SGP-2 isolated from the rhizomes of *Smilax glabra*,  
319 significantly suppressed the release of NO, TNF- $\alpha$  and IL-6 from LPS-induced RAW  
320 264.7 cells (78). A prenylated flavonoid, 10-oxomornigrol F (OMF), can inhibit the  
321 LPS-induced production of NO, TNF- $\alpha$ , IL-1 $\beta$  and IL-6 in RAW264.7 cells (79). To  
322 our surprise, rFIP-glu acted in strong synergy with LPS to induce the mRNA  
323 expression levels of TNF- $\alpha$ , MCP-1 (CCL-2) and Arginase II. Meanwhile, mRNA  
324 level of IL-10 was still suppressed by rFIP-glu in LPS stimulated RAW264.7 cells.  
325 Another immunomodulatory protein, FIP-*apo* (APP) from *Auricularia polytricha*, also  
326 accounts for synergistic effects with LPS by NO and TNF- $\alpha$  production (80). These  
327 results mentioned above suggest that rFIP-glu can balance M1/M2 macrophages by  
328 regulating pro- and anti-inflammatory mediators and exhibit immunomodulatory  
329 activity. This phenomenon may confer macrophages an ability to quickly switch  
330 between M1 or M2 associated functions allowing for appropriate responses to stimuli  
331 and tissue environment (81). Re-polarization of macrophages is a key role and a  
332 promising therapeutic option in many diseases (26, 82). For example, inflammatory  
333 bowel diseases can be ameliorated by switching M1 macrophages to M2 (83, 84).

334 Conversion of M2 to M1 phenotype is a potential therapeutic intervention in  
335 anti-tumor (85, 86).

336 Obviously, rFIP-glu has the ability to activate macrophages. The mechanisms  
337 were further investigated. In this study, RNA-seq was used to investigate the  
338 mechanisms of macrophage activation in rFIP-glu-treated RAW 264.7 cells. Our  
339 results indicated that the macrophage activation induced by rFIP-glu involved  
340 Toll-like receptors and MAPKs signaling pathways in macrophage RAW264.7 cells,  
341 which is consistent with that PI3K/Akt, the downstream of Toll-like receptor, and  
342 MAPK are involved in the activation of macrophages (34, 87-89). TLR4 is critical in  
343 immune responses and involved mainly in inflammation responses (90). TLR4 can be  
344 recognized and activated by many stimuli such as polysaccharides, and its expression  
345 increases, and then activates PI3K/Akt and MAPKs pathways, with introduction of a  
346 pool of inflammatory mediators (30, 34, 43, 87, 91). In addition, NF- $\kappa$ B involves in  
347 macrophage activation as well (24, 34, 92, 93). Similarly, RNA-seq analysis indicated  
348 that NF- $\kappa$ B pathway participated in rFIP-glu-mediated macrophage activation. More  
349 evidences should be investigated in the future. Although rFIP-glu activated Toll-like  
350 receptors, MAPKs and NF- $\kappa$ B pathways, RNA-seq (Fig. S2) and qRT-PCR (Fig. S5)  
351 confirmed that the mRNA expression level of TLR4 did not change. It suggests that  
352 the mRNA expression of pro-inflammatory genes induced by rFIP-glu was not  
353 through activating the TLR4 signaling pathway. RNA-seq analysis showed that TLR2  
354 mRNA expression increased (Fig. S2), presuming TLR2 was a receptor of rFIP-glu. A  
355 preliminary yeast two-hybrid experiment showed that rFIP-glu did not interact with



356 an extracellular part of TLR2 (Data not shown), suggesting TLR2 possibly was not a  
357 receptor of rFIP-glu as well. It is noteworthy that some active substances can activate  
358 all of these pathways (34, 57, 88), while some can only activate one or more (30, 87,  
359 94). We next used specific PI3K/Akt and MAPKs pathway inhibitors to clarify  
360 whether these signaling pathways were involved in macrophage activation induced by  
361 rFIP-glu. Our results implied the involvement of PI3K in rFIP-glu mediated MCP-1  
362 (CCL-2) mRNA production, MEK1/2 in TNF- $\alpha$  and MCP-1 (CCL-2), and JNK in  
363 iNOS. Although the induction of phosphorylated MAPKs and PI3K/Akt receptors was  
364 not evaluated by Western blot, the participation of them was confirmed by RNA-seq  
365 as well as inhibition of the effects induced by pretreatment with signaling pathway  
366 inhibitors. These results indicate that rFIP-glu may enter cells and act with MEK1/2,  
367 JNK or PI3K indirectly or directly, and another hypothesis is that rFIP-glu interacts  
368 with TLR2 within cells (Fig. 8). In addition, the synergistic activity of rFIP-glu and  
369 LPS implied that rFIP-glu could enhance the expression of downstream mediators that  
370 are generated by Toll-like receptors pathway (80). Heme oxygenase-1 (HO-1) is an  
371 anti-inflammatory enzyme and attenuates the inflammatory response (95), which can  
372 be regulated by nuclear factor erythroid 2-related factor 2 (Nrf2) in the inflammatory  
373 response (96). The Induction of HO-1 can be through MAPK and PI3K signaling  
374 pathways (94, 97, 98). In the present study, mRNA level of HO-1 was significantly  
375 increased in rFIP-glu-induced RAW264.7 cells (Fig. S6). This result implies that the  
376 anti-inflammation of rFIP-glu is possibly mediated by HO-1 in macrophage  
377 RAW264.7 cells.

378

## 379 **MATERIALS AND METHODS**

380 **Reagents.** Neutral red staining solution was obtained from Sangon Biotech  
381 (Shanghai, China). U0126 (MEK1/2 inhibitor), SP600125 (JNK inhibitor) and  
382 SB203580 (p38 inhibitor) were purchased from Beyotime (Shanghai, China).  
383 LY294002 (PI3K inhibitor) was purchased from Selleck Chemicals (Houston, TX,  
384 USA). Anti-FIP-glu antiserum was raised in rabbits (99). Anti-6×His Tag mouse  
385 monoclonal antibody, HRP-conjugated Goat Anti-Mouse IgG and HRP-conjugated  
386 Goat Anti-Rabbit IgG were from Sangon Biotech (Shanghai, China).

387

388 **Production of rFIP-glu.** Production of recombinant FIP-glu (rFIP-glu) in *P.*  
389 *pastoris* was performed according to the instruction provided by Pichia Expression  
390 Kit (Invitrogen, USA). Briefly, a gene encoding FIP-glu and subcloned in pUC-57  
391 vector was synthesized by Sangon Biotech (Shanghai) Co., Ltd. (China) based on  
392 codon usage bias. Then, the gene was cloned into an expression cassette vector  
393 pPIC9K. For convenience, a His-tag was added at 3' end of multiple clone sites of the  
394 vector. After construction, the recombinant expression vector pPIC9K-glu-His  
395 linearized by a restriction enzyme *Sac* I was transferred into *P. pastoris* GS115. After  
396 confirmed by PCR (100) and sequencing, the transformant was induced by methanol  
397 for producing rFIP-glu. The rFIP-glu was purified with nickel-nitrilotriacetic acid  
398 (Ni-NTA) agarose resin (TaKaRa, Beijing, China). SDS-PAGE and Western blot  
399 analysis were performed based on the methods of our lab (99, 101).

400

401       **Cell culture.** Macrophage RAW264.7 cells were purchased from the Cell Bank  
402 of the Chinese Academy of Sciences (Shanghai, China), cultivated in DMEM medium  
403 supplemented with antibiotics (100 U/mL penicillin and 100 mg/mL streptomycin)  
404 and 10% FBS and incubated at 37 °C in a 5% CO<sub>2</sub> incubator. Cells were seeded at 2 ×  
405 10<sup>5</sup> cells per well in 24- or 96-well microplates and were incubated in 5% CO<sub>2</sub> at  
406 37 °C.

407

408       **Cell viability.** Methylene blue uptake assay was performed to assess the effect  
409 of rFIP-glu on the viability of macrophage RAW264.7 cells (102). Briefly, Raw264.7  
410 cells were incubated for 24 h, and then were incubated with rFIP-glu at different  
411 concentration (1, 2, 4 and 8 µg/mL), LPS (1 µg/mL) and Concanavalin A (ConA) (5  
412 µg/mL) for 24 h. LPS and ConA were used as positive controls. The culture  
413 supernatant was discarded and cells were stained by adding 50 µL of 0.6% methylene  
414 blue to each well. Plates were incubated at 37 °C for 60 min, and then inverted to  
415 drain the stain solution away. Wells were washed with phosphate buffered saline (PBS)  
416 to remove unbound stain. Plates were air-dried for several minutes. Stained cells were  
417 solubilized by adding 50 µL of Elution Buffer (Ethanol : PBS : Acetic acid = 50 : 49 :  
418 1 (Volume)) for 20 min with a gentle shake. The absorbance value was measured at  
419 570 nm using a microplate reader (BIO-TEK<sup>®</sup>, USA) and the viability was expressed  
420 as percentage versus control group.

421

422           **Phagocytosis assay.** Phagocytosis assay was measured by Neutral red uptake  
423 assay (42). Briefly, Raw264.7 cells were incubated for 24 h, and then incubated with  
424 rFIP-glu at different concentration (1, 2, 4 and 8 µg/mL) and ConA (5 µg/mL) for 24 h.  
425 After the supernatant was discarded, 100 µL neutral red staining solution was added  
426 into each well and the plates were continued to incubate for 30 min. The supernatant  
427 was discarded and the cells were washed with PBS thrice to move free neutral red.  
428 200 µL of cell lysis buffer (Ethanol : Acetic acid = 1 : 1 (Volume)) was added into  
429 each well and the plates were shaken for 2 h at room temperature. The absorbance  
430 value was measured at 540 nm using a microplate reader (BIO-TEK<sup>®</sup>, USA) and the  
431 phagocytosis was expressed as OD values.

432

433           **Measurement of NO.** Raw264.7 cells were incubated for 24 h, and then were  
434 incubated with rFIP-glu at different concentration (1, 2, 4 and 8 µg/mL) and LPS (1  
435 µg/mL) for 24 h. The supernatants were used to evaluate NO production using Griess  
436 assay by a NO Assay kit (Beyotime, Shanghai, China). According to the  
437 manufacturer's protocol, sodium nitrite (NaNO<sub>2</sub>) was used to generate a standard  
438 curve to calculate the NO concentration.

439

440           **RNA extraction, sequencing and bioinformatics analysis.** Macrophage  
441 RAW264.7 cells were cultured with rFIP-glu (4 µg/mL) for 6 h. Cells were harvested  
442 and total RNA was extracted using TaKaRa MiniBEST Universal RNA Extraction Kit  
443 (Beijing, China). Sequencing library was generated using Illumina Truseq stranded

444 total RNA LT kit. On average 20 million Illumina paired-end reads (150 bp) were  
445 generated for each sample. The reads were mapped to reference using Hisat and  
446 differential expression analysis was performed using the R package DESeq2. In  
447 addition, principle component analysis (PCA) was carried out on the genes  
448 significantly expressed between all different groups. We combined results of two  
449 Enrichment analysis tools. One was derived from GSEA 3.0 desktop by mapping all  
450 genes to biological process of GO knowledge base and KEGG knowledge base. The  
451 other was calculated by IPA (version 01-13) of which cutoff was  $FDR \leq 0.001$  and  
452  $\text{Log}_2\text{FoldChange} > 1$ . The data were also analyzed on the free online platform of  
453 Majorbio I-Sanger Cloud Platform ([www.i-sanger.com](http://www.i-sanger.com)).

454

455 **cDNA synthesis and Real-time quantitative PCR (RT-qPCR).** cDNA  
456 was synthesized from 1  $\mu\text{g}$  RNA using PrimeScript™ RT Master Mix (Perfect Real  
457 Time) (TaKaRa, Beijing, China) according to the manufacturer's protocol. RT-qPCR  
458 was performed using SYBR qPCR Master Mix (Vazyme, Nanjing, China) and Roche  
459 LightCycler® 96 Application. For PCR, samples were heated to 95 °C for 1 min,  
460 denatured at 95 °C for 20 s, annealed at 55 °C for 20 s, extended at 72 °C for 20 s, and  
461 cycled 45 times. The primers in this study were listed in Table S1. All reactions were  
462 performed in triplicate, and Ct values were normalized to  $\beta$ -actin. Relative expression  
463 was calculated using the  $2^{-\Delta\Delta\text{Ct}}$  method.

464

465 **Statistical analysis.** Graph Pad Prism 7 software was used to prepare graphs

466 and statistical analysis. Data are expressed as means  $\pm$  SD. The statistical analysis  
467 used One-way ANOVA analysis. Significance was indicated as ns,  $p > 0.05$ ; \*,  $p \leq$   
468 0.05; \*\*,  $p \leq 0.01$ ; \*\*\*,  $p \leq 0.001$ ; and \*\*\*\*,  $p \leq 0.0001$ .

469

## 470 **ACKNOWLEDGMENTS**

471 This study was funded by the Tibet Shenglong Industry Co., Ltd. (No.  
472 2013310031001210).

473

## 474 **REFERENCE**

- 475 1. Zhou XW, Su KQ, Zhang YM. 2012. Applied modern biotechnology for  
476 cultivation of *Ganoderma* and development of their products. *Appl Microbiol*  
477 *Biotechnol* 93:941-963.
- 478 2. El Enshasy HA, Hatti-Kaul R. 2013. Mushroom immunomodulators: unique  
479 molecules with unlimited applications. *Trends Biotechnol* 31:668-677.
- 480 3. Bastiaan-Net S, Chanput W, Hertz A, Zwittink RD, Mes JJ, Wichers HJ. 2013.  
481 Biochemical and functional characterization of recombinant fungal  
482 immunomodulatory proteins (rFIPs). *Int Immunopharmacol* 15:167-175.
- 483 4. Lin JW, Guan SY, Duan ZW, Shen YH, Fan WL, Chen LJ, Zhang L, Zhang L,  
484 Li TL. 2016. Gene cloning of a novel fungal immunomodulatory protein from  
485 *Chroogomphus rutilus* and its expression in *Pichia pastoris*. *J Chem Technol*  
486 *Biotechnol* 91:2761-2768.
- 487 5. Li S, Jiang Z, Sun L, Liu X, Huang Y, Wang F, Xin F. 2017. Characterization  
488 of a new fungal immunomodulatory protein, FIP-dsq2 from *Dichomitus*

- 489           *squalens*. J Biotechnol 246:45-51.
- 490   6.    Li S, Jiang Z, Xu W, Xie Y, Zhao L, Tang X, Wang F, Xin F. 2017. FIP-sch2, a  
491           new fungal immunomodulatory protein from *Stachybotrys chlorohalonata*,  
492           suppresses proliferation and migration in lung cancer cells. Appl Microbiol  
493           Biotechnol 101:3227-3235.
- 494   7.    Li QZ, Wang XF, Zhou XW. 2011. Recent status and prospects of the fungal  
495           immunomodulatory protein family. Crit Rev Biotechnol 31:365-375.
- 496   8.    Liao CH, Hsiao YM, Sheu GT, Chang JT, Wang PH, Wu MF, Shieh GJ, Hsu  
497           CP, Ko JL. 2007. Nuclear translocation of telomerase reverse transcriptase and  
498           calcium signaling in repression of telomerase activity in human lung cancer  
499           cells by fungal immunomodulatory protein from *Ganoderma tsugae*. Biochem  
500           Pharmacol 74:1541-1554.
- 501   9.    Haendeler J, Hoffmann J, Brandes RP, Zeiher AM, Dimmeler S. 2003.  
502           Hydrogen peroxide triggers nuclear export of telomerase reverse transcriptase  
503           via Src kinase family-dependent phosphorylation of tyrosine 707. Mol Cell  
504           Biol 23:4598-4610.
- 505   10.   Chiu LY, Hu ME, Yang TY, Hsin IL, Ko JL, Tsai KJ, Sheu GT. 2015.  
506           Immunomodulatory protein from *Ganoderma microsporum* induces pro-death  
507           autophagy through Akt-mTOR-p70S6K pathway inhibition in multidrug  
508           resistant lung cancer cells. PLoS One 10:e0125774.
- 509   11.   Hsin IL, Hsu JC, Wu WJ, Lu HJ, Wu MF, Ko JL. 2018. GMI, a fungal  
510           immunomodulatory protein from *Ganoderma microsporum*, induce apoptosis

- 511            *via* beta-catenin suppression in lung cancer cells. *Environ Toxicol* 33:955-961.
- 512    12.    Lee YT, Wu CT, Sun HL, Ko JL, Lue KH. 2017. Fungal immunomodulatory  
513            protein-fve could modulate airway remodel through by affect IL17 cytokine. *J*  
514            *Microbiol Immunol Infect* 51:598-607.
- 515    13.    Li SY, Shi LJ, Ding Y, Nie Y, Tang XM. 2015. Identification and functional  
516            characterization of a novel fungal immunomodulatory protein from *Postia*  
517            *placenta*. *Food Chem Toxicol* 78:64-70.
- 518    14.    Xu H, Kong YY, Chen X, Guo MY, Bai XH, Lu YJ, Li W, Zhou XW. 2016.  
519            Recombinant FIP-gat, a fungal immunomodulatory protein from *Ganoderma*  
520            *atrum*, induces growth inhibition and cell death in breast cancer cells. *J Agric*  
521            *Food Chem* 64:2690-2698.
- 522    15.    Chu PY, Sun HL, Ko JL, Ku MS, Lin LJ, Lee YT, Liao PF, Pan HH, Lu HL,  
523            Lue KH. 2017. Oral fungal immunomodulatory protein-*Flammulina velutipes*  
524            has influence on pulmonary inflammatory process and potential treatment for  
525            allergic airway disease: a mouse model. *J Microbiol Immunol Infect*  
526            50:297-306.
- 527    16.    Lee YT, Lee SS, Sun HL, Lu KH, Ku MS, Sheu JN, Ko JL, Lue KH. 2013.  
528            Effect of the fungal immunomodulatory protein FIP-fve on airway  
529            inflammation and cytokine production in mouse asthma model. *Cytokine*  
530            61:237-244.
- 531    17.    Liang C, Li H, Zhou H, Zhang S, Liu Z, Zhou Q, Sun F. 2012. Recombinant  
532            Lz-8 from *Ganoderma lucidum* induces endoplasmic reticulum



- 533 stress-mediated autophagic cell death in SGC-7901 human gastric cancer cells.  
534 Oncol Rep 27:1079-1089.
- 535 18. Davies LC, Jenkins SJ, Allen JE, Taylor PR. 2013. Tissue-resident  
536 macrophages. Nat Immunol 14:986-995.
- 537 19. Sica A, Erreni M, Allavena P, Porta C. 2015. Macrophage polarization in  
538 pathology. Cell Mol Life Sci 72:4111-4126.
- 539 20. Nonnenmacher Y, Hiller K. 2018. Biochemistry of proinflammatory  
540 macrophage activation. Cell Mol Life Sci 75:2093-2109.
- 541 21. Vergadi E, Ieronymaki E, Lyroni K, Vaporidi K, Tsatsanis C. 2017. Akt  
542 signaling pathway in macrophage activation and M1/M2 polarization. J  
543 Immunol 198:1006-1014.
- 544 22. Galvan-Pena S, O'Neill LA. 2014. Metabolic reprogramming in macrophage  
545 polarization. Front Immunol 5:420.
- 546 23. Bashir S, Sharma Y, Elahi A, Khan F. 2016. Macrophage polarization: the link  
547 between inflammation and related diseases. Inflamm Res 65:1-11.
- 548 24. Zhang Y, Liu D, Fang L, Zhao X, Zhou A, Xie J. 2018. A galactomannoglucan  
549 derived from *Agaricus brasiliensis*: purification, characterization and  
550 macrophage activation *via* MAPK and I $\kappa$ B/NF $\kappa$ B pathways. Food  
551 Chem 239:603-611.
- 552 25. Schett G, Neurath MF. 2018. Resolution of chronic inflammatory disease:  
553 universal and tissue-specific concepts. Nat Commun 9:3261.
- 554 26. Shapouri-Moghaddam A, Mohammadian S, Vazini H, Taghadosi M, Esmaeili

- 555 SA, Mardani F, Seifi B, Mohammadi A, Afshari JT, Sahebkar A. 2018.  
556 Macrophage plasticity, polarization, and function in health and disease. *J Cell*  
557 *Physiol* 233:6425-6440.
- 558 27. Kollmann TR, Levy O, Montgomery RR, Goriely S. 2012. Innate immune  
559 function by Toll-like receptors: distinct responses in newborns and the elderly.  
560 *Immunity* 37:771-783.
- 561 28. Hug H, Mohajeri MH, La Fata G. 2018. Toll-like receptors: regulators of the  
562 immune response in the human gut. *Nutrients* 10:203.
- 563 29. Zhu L, Jones C, Zhang G. 2018. The role of phospholipase C signaling in  
564 macrophage-mediated inflammatory response. *J Immunol Res* 2018:5201759.
- 565 30. Wang DD, Pan WJ, Mehmood S, Chen XD, Chen Y. 2018. Polysaccharide  
566 isolated from *Sarcodon aspratus* induces RAW264.7 activity via  
567 TLR4-mediated NF-kappaB and MAPK signaling pathways. *Int J Biol*  
568 *Macromol* 120:1039-1047.
- 569 31. Yu T, Gao M, Yang P, Liu D, Wang D, Song F, Zhang X, Liu Y. 2018. Insulin  
570 promotes macrophage phenotype transition through PI3K/Akt and  
571 PPAR-gamma signaling during diabetic wound healing. *J Cell Physiol*  
572 doi:10.1002/jcp.27185.
- 573 32. Lim JE, Chung E, Son Y. 2017. A neuropeptide, Substance-P, directly induces  
574 tissue-repairing M2 like macrophages by activating the PI3K/Akt/mTOR  
575 pathway even in the presence of IFN $\gamma$ . *Sci Rep* 7:9417.
- 576 33. Song M, Han L, Chen FF, Wang D, Wang F, Zhang L, Wang ZH, Zhong M,

- 577 Tang MX, Zhang W. 2018. Adipocyte-derived exosomes carrying sonic  
578 hedgehog mediate M1 macrophage polarization-induced insulin resistance *via*  
579 Ptch and PI3K pathways. *Cell Physiol Biochem* 48:1416-1432.
- 580 34. Ren D, Lin D, Alim A, Zheng Q, Yang X. 2017. Chemical characterization of  
581 a novel polysaccharide ASKP-1 from *Artemisia sphaerocephala* Krasch seed  
582 and its macrophage activation *via* MAPK, PI3k/Akt and NF-kappaB signaling  
583 pathways in RAW264.7 cells. *Food Funct* 8:1299-1312.
- 584 35. Zhao Y, Wang CL, Li RM, Hui TQ, Su YY, Yuan Q, Zhou XD, Ye L. 2014.  
585 Wnt5a promotes inflammatory responses *via* nuclear factor kappaB  
586 (NF-kappaB) and mitogen-activated protein kinase (MAPK) pathways in  
587 human dental pulp cells. *J Biol Chem* 289:21028-21039.
- 588 36. Wang W, Liu P, Hao C, Wu L, Wan W, Mao X. 2017.  
589 Neoagaro-oligosaccharide monomers inhibit inflammation in LPS-stimulated  
590 macrophages through suppression of MAPK and NF-kappaB pathways. *Sci*  
591 *Rep* 7:44252.
- 592 37. Liu Q, Xiao XH, Hu LB, Jie HY, Wang Y, Ye WC, Li MM, Liu Z. 2017.  
593 Anhuinoside C ameliorates collagen-induced arthritis through inhibition of  
594 MAPK and NF-kappaB signaling pathways. *Front Pharmacol* 8:299.
- 595 38. Sica A, Mantovani A. 2012. Macrophage plasticity and polarization: *in vivo*  
596 *veritas*. *J Clin Invest* 122:787-795.
- 597 39. Tanaka S, Ko K, Kino K, Tsuchiya K, Yamashita A, Murasugi A, Sakuma S,  
598 Tsunoo H. 1989. Complete amino acid sequence of an immunomodulatory

- 599 protein, ling zhi-8 (LZ-8). An immunomodulator from a fungus, *Ganoderma*  
600 *lucidum*, having similarity to immunoglobulin variable regions. J Biol Chem  
601 264:16372-16377.
- 602 40. Kino K, Yamashita A, Yamaoka K, Watanabe J, Tanaka S, Ko K, Shimizu K,  
603 Tsunoo H. 1989. Isolation and characterization of a new immunomodulatory  
604 protein, ling zhi-8 (LZ-8), from *Ganoderma lucidum*. J Biol Chem  
605 264:472-478.
- 606 41. Aderem A, Underhill DM. 1999. Mechanisms of phagocytosis in macrophages.  
607 Annu Rev Immunol 17:593-623.
- 608 42. Xiong L, Ouyang KH, Jiang Y, Yang ZW, Hu WB, Chen H, Wang N, Liu X,  
609 Wang WJ. 2018. Chemical composition of *Cyclocarya paliurus*  
610 polysaccharide and inflammatory effects in lipopolysaccharide-stimulated  
611 RAW264.7 macrophage. Int J Biol Macromol 107:1898-1907.
- 612 43. Zhang M, Tian X, Wang Y, Wang D, Li W, Chen L, Pan W, Mehmood S, Chen  
613 Y. 2018. Immunomodulating activity of the polysaccharide TLH-3 from  
614 *Tricholomalobayense* in RAW264.7 macrophages. Int J Biol Macromol  
615 107:2679-2685.
- 616 44. Wu W, Zhang M, Ren Y, Cai X, Yin Z, Zhang X, Min T, Wu H. 2017.  
617 Characterization and immunomodulatory activity of a novel peptide, ECFSTA,  
618 from wheat germ globulin. J Agric Food Chem 65:5561-5569.
- 619 45. Sheu F, Chien PJ, Hsieh KY, Chin KL, Huang WT, Tsao CY, Chen YF, Cheng  
620 HC, Chang HH. 2009. Purification, cloning, and functional characterization of

- 621 a novel immunomodulatory protein from *Antrodia camphorata* (bitter  
622 mushroom) that exhibits TLR2-dependent NF-kappaB activation and M1  
623 polarization within murine macrophages. *J Agric Food Chem* 57:4130-4141.
- 624 46. Shruthi RR, Venkatesh YP, Muralikrishna G. 2017. Structural and functional  
625 characterization of a novel immunomodulatory glycoprotein isolated from  
626 ajowan (*Trachyspermum ammi* L.). *Glycoconj J* 34:499-514.
- 627 47. Ahmad W, Jantan I, Kumolosasi E, Haque MA, Bukhari SNA. 2018.  
628 Immunomodulatory effects of *Tinospora crispa* extract and its major  
629 compounds on the immune functions of RAW 264.7 macrophages. *Int*  
630 *Immunopharmacol* 60:141-151.
- 631 48. Lu H, Zhang L, Zhao H, Li JJ, You HL, Jiang L, Hu JE. 2018. Activation of  
632 macrophages *in vitro* by phospholipids from brain of *Katsuwonus pelamis*  
633 (Skipjack Tuna). *J Oleo Sci* 67:327-333.
- 634 49. Ravetch JV, Bolland S. 2001. IgG Fc receptors. *Annu Rev Immunol*  
635 19:275-290.
- 636 50. Joshi T, Butchar JP, Tridandapani S. 2006. Fcgamma receptor signaling in  
637 phagocytes. *Int J Hematol* 84:210-216.
- 638 51. Park JB. 2003. Phagocytosis induces superoxide formation and apoptosis in  
639 macrophages. *Exp Mol Med* 35:325-335.
- 640 52. Victor JR, Muniz BP, Fusaro AE, de Brito CA, Taniguchi EF, Duarte AJ, Sato  
641 MN. 2010. Maternal immunization with ovalbumin prevents neonatal allergy  
642 development and up-regulates inhibitory receptor Fc gamma RIIB expression

- 643 on B cells. BMC Immunol 11:11.
- 644 53. Wu J, Lin R, Huang J, Guan W, Oetting WS, Sriramarao P, Blumenthal MN.  
645 2014. Functional Fcγ receptor polymorphisms are associated with  
646 human allergy. PLoS One 9:e89196.
- 647 54. Burton OT, Epp A, Fanny ME, Miller SJ, Stranks AJ, Teague JE, Clark RA,  
648 van de Rijn M, Oettgen HC. 2018. Tissue-specific expression of the  
649 low-affinity IgG receptor, FcγRIIb, on human mast cells. Front Immunol  
650 9:1244.
- 651 55. Burton OT, Tamayo JM, Stranks AJ, Koleoglou KJ, Oettgen HC. 2018.  
652 Allergen-specific IgG antibody signaling through FcγRIIb promotes  
653 food tolerance. J Allergy Clin Immunol 141:189-201. e3.
- 654 56. Billack B. 2006. Macrophage activation: role of toll-like receptors, nitric oxide,  
655 and nuclear factor kappa B. Am J Pharm Educ 70:102.
- 656 57. Meng Y, Yan J, Yang G, Han Z, Tai G, Cheng H, Zhou Y. 2018. Structural  
657 characterization and macrophage activation of a hetero-galactan isolated from  
658 *Flammulina velutipes*. Carbohydr Polym 183:207-218.
- 659 58. Moreno-Fierros L, Garcia-Hernandez AL, Ilhuicatzí-Alvarado D,  
660 Rivera-Santiago L, Torres-Martínez M, Rubio-Infante N, Legorreta-Herrera M.  
661 2013. Cry1Ac protoxin from *Bacillus thuringiensis* promotes macrophage  
662 activation by upregulating CD80 and CD86 and by inducing IL-6, MCP-1 and  
663 TNF-α cytokines. Int Immunopharmacol 17:1051-1066.
- 664 59. Lull C, Wichers HJ, Savelkoul HF. 2005. Antiinflammatory and

- 665 immunomodulating properties of fungal metabolites. *Mediators Inflamm*  
666 2005:63-80.
- 667 60. Chang HH, Yeh CH, Sheu F. 2009. A novel immunomodulatory protein from  
668 *Poria cocos* induces Toll-like receptor 4-dependent activation within mouse  
669 peritoneal macrophages. *J Agric Food Chem* 57:6129-6139.
- 670 61. Ng A, Tam WW, Zhang MW, Ho CS, Husain SF, McIntyre RS, Ho RC. 2018.  
671 IL-1beta, IL-6, TNF-alpha and CRP in elderly patients with depression or  
672 Alzheimer's disease: systematic review and meta-analysis. *Sci Rep* 8:12050.
- 673 62. Deshmane SL, Kremlev S, Amini S, Sawaya BE. 2009. Monocyte  
674 chemoattractant protein-1 (MCP-1): an overview. *J Interferon Cytokine Res*  
675 29:313-326.
- 676 63. Daly C, Rollins BJ. 2003. Monocyte chemoattractant protein-1 (CCL2) in  
677 inflammatory disease and adaptive immunity: therapeutic opportunities and  
678 controversies. *Microcirculation* 10:247-257.
- 679 64. Khallou-Laschet J, Varthaman A, Fornasa G, Compain C, Gaston AT, Clement  
680 M, Dussiot M, Levillain O, Graff-Dubois S, Nicoletti A, Caligiuri G. 2010.  
681 Macrophage plasticity in experimental atherosclerosis. *PLoS One* 5:e8852.
- 682 65. Ming XF, Rajapakse AG, Yepuri G, Xiong Y, Carvas JM, Ruffieux J, Scerri I,  
683 Wu Z, Popp K, Li J, Sartori C, Scherrer U, Kwak BR, Montani JP, Yang Z.  
684 2012. Arginase II promotes macrophage inflammatory responses through  
685 mitochondrial reactive oxygen species, contributing to insulin resistance and  
686 atherogenesis. *J Am Heart Assoc* 1:e000992.

- 687 66. Fauskanger M, Haabeth OAW, Skjeldal FM, Bogen B, Tveita AA. 2018.  
688 Tumor killing by CD4(+) T cells is mediated *via* induction of inducible nitric  
689 oxide synthase-dependent macrophage cytotoxicity. *Front Immunol* 9:1684.
- 690 67. Villalta SA, Rinaldi C, Deng B, Liu G, Fedor B, Tidball JG. 2011.  
691 Interleukin-10 reduces the pathology of mdx muscular dystrophy by  
692 deactivating M1 macrophages and modulating macrophage phenotype. *Hum*  
693 *Mol Genet* 20:790-805.
- 694 68. Mahon OR, O'Hanlon S, Cunningham CC, McCarthy GM, Hobbs C, Nicolosi  
695 V, Kelly DJ, Dunne A. 2018. Orthopaedic implant materials drive M1  
696 macrophage polarization in a spleen tyrosine kinase- and mitogen-activated  
697 protein kinase-dependent manner. *Acta Biomater* 65:426-435.
- 698 69. Kim B, Kim EY, Lee EJ, Han JH, Kwak CH, Jung YS, Lee SO, Chung TW,  
699 Ha KT. 2018. *Panax notoginseng* inhibits tumor growth through activating  
700 macrophage to M1 polarization. *Am J Chin Med* 46:1369-1385.
- 701 70. Tian L, Li W, Yang L, Chang N, Fan X, Ji X, Xie J, Yang L, Li L. 2017.  
702 Cannabinoid receptor 1 participates in liver inflammation by promoting M1  
703 macrophage polarization *via* RhoA/NF-kappaB p65 and ERK1/2 pathways,  
704 respectively, in mouse liver fibrogenesis. *Front Immunol* 8:1214.
- 705 71. Pachulec E, Abdelwahed Bagga RB, Chevallier L, O'Donnell H, Guillas C,  
706 Jaubert J, Montagutelli X, Carniel E, Demeure CE. 2017. Enhanced  
707 macrophage M1 polarization and resistance to apoptosis enable resistance to  
708 plague. *J Infect Dis* 216:761-770.



- 709 72. Lehmann JM, Claus K, Jansen C, Pohlmann A, Schierwagen R, Meyer C,  
710 Thomas D, Manekeller S, Claria J, Strassburg CP, Trautwein C, Wasmuth HE,  
711 Berres ML, Trebicka J. 2018. Circulating CXCL10 in cirrhotic portal  
712 hypertension might reflect systemic inflammation and predict ACLF and  
713 mortality. *Liver Int* 38:875-884.
- 714 73. Wasmuth HE, Tacke F, Trautwein C. 2010. Chemokines in liver inflammation  
715 and fibrosis. *Semin Liver Dis* 30:215-225.
- 716 74. Qin Y, Sun X, Shao X, Cheng C, Feng J, Sun W, Gu D, Liu W, Xu F, Duan Y.  
717 2015. Macrophage-microglia networks drive M1 microglia polarization after  
718 mycobacterium infection. *Inflammation* 38:1609-1616.
- 719 75. Matsui M, Adib-Conquy M, Coste A, Kumar-Roine S, Pipy B, Laurent D,  
720 Pauillac S. 2012. Aqueous extract of *Vitex trifolia* L. (Labiatae) inhibits  
721 LPS-dependent regulation of inflammatory mediators in RAW 264.7  
722 macrophages through inhibition of Nuclear Factor kappa B translocation and  
723 expression. *J Ethnopharmacol* 143:24-32.
- 724 76. Ashley JW, Hancock WD, Nelson AJ, Bone RN, Tse HM, Wohltmann M, Turk  
725 J, Ramanadham S. 2016. Polarization of macrophages toward M2 phenotype  
726 is favored by reduction in iPLA2beta (Group VIA phospholipase A2). *J Biol*  
727 *Chem* 291:23268-23281.
- 728 77. Cheng Y, Yang C, Luo D, Li X, Le XC, Rong J. 2018. N-propargyl caffeamide  
729 skews macrophages towards a resolving M2-like phenotype against  
730 myocardial ischemic injury *via* activating Nrf2/HO-1 pathway and inhibiting

- 731 NF- $\kappa$ B pathway. *Cell Physiol Biochem* 47:2544-2557.
- 732 78. Lu CL, Wei Z, Min W, Hu MM, Chen WL, Xu XJ, Lu CJ. 2015.  
733 Polysaccharides from *Smilax glabra* inhibit the pro-inflammatory mediators  
734 via ERK1/2 and JNK pathways in LPS-induced RAW264.7 cells. *Carbohydr*  
735 *Polym* 122:428-436.
- 736 79. Tran PL, Tran PT, Tran HNK, Lee S, Kim O, Min BS, Lee JH. 2018. A  
737 prenylated flavonoid, 10-oxomornigrol F, exhibits anti-inflammatory effects  
738 by activating the Nrf2/heme oxygenase-1 pathway in macrophage cells. *Int*  
739 *Immunopharmacol* 55:165-173.
- 740 80. Sheu F, Chien PJ, Chien AL, Chen YF, Chin KL. 2004. Isolation and  
741 characterization of an immunomodulatory protein (APP) from the Jew's Ear  
742 mushroom *Auricularia polytricha*. *Food Chemistry* 87:593-600.
- 743 81. Mitsi E, Kamng'ona R, Rylance J, Solorzano C, Jesus Reine J, Mwandumba  
744 HC, Ferreira DM, Jambo KC. 2018. Human alveolar macrophages  
745 predominately express combined classical M1 and M2 surface markers in  
746 steady state. *Respir Res* 19:66.
- 747 82. Na YR, Je S, Seok SH. 2018. Metabolic features of macrophages in  
748 inflammatory diseases and cancer. *Cancer Lett* 413:46-58.
- 749 83. Zhu Y, Li X, Chen J, Chen T, Shi Z, Lei M, Zhang Y, Bai P, Li Y, Fei X. 2016.  
750 The pentacyclic triterpene Lupeol switches M1 macrophages to M2 and  
751 ameliorates experimental inflammatory bowel disease. *Int Immunopharmacol*  
752 30:74-84.

- 753 84. Jang SE, Han MJ, Kim SY, Kim DH. 2014. *Lactobacillus plantarum*  
754 CLP-0611 ameliorates colitis in mice by polarizing M1 to M2-like  
755 macrophages. *Int Immunopharmacol* 21:186-192.
- 756 85. Yao J, Du Z, Li Z, Zhang S, Lin Y, Li H, Zhou L, Wang Y, Yan G, Wu X, Duan  
757 Y, Du G. 2018. 6-Gingerol as an arginase inhibitor prevents urethane-induced  
758 lung carcinogenesis by reprogramming tumor supporting M2 macrophages to  
759 M1 phenotype. *Food Funct* 9:4611-4620.
- 760 86. Zhu Z, Scalfi-Happ C, Ryabova A, Grafe S, Wiehe A, Peter RU, Loschenov V,  
761 Steiner R, Wittig R. 2018. Photodynamic activity of Temoporfin nanoparticles  
762 induces a shift to the M1-like phenotype in M2-polarized macrophages. *J*  
763 *Photochem Photobiol B* 185:215-222.
- 764 87. Yang Y, Xing RG, Liu S, Qin YK, Li KC, Yu HH, Li PC. 2018.  
765 Immunostimulatory effects of sulfated chitosans on RAW 264.7 mouse  
766 macrophages *via* the activation of PI3K/Akt signaling pathway. *Int J Bio*  
767 *Macromol* 108:1310-1321.
- 768 88. Torres-Martinez M, Rubio-Infante N, Garcia-Hernandez AL, Nava-Acosta R,  
769 Ilhuicatzí-Alvarado D, Moreno-Fierros L. 2016. Cry1Ac toxin induces  
770 macrophage activation *via* ERK1/2, JNK and p38 mitogen-activated protein  
771 kinases. *Int J Biochem Cell Biol* 78:106-115.
- 772 89. Solinas G, Becattini B. 2017. The role of PI3K $\gamma$  in metabolism and  
773 macrophage activation. *Oncotarget* 8:106145-106146.
- 774 90. Vidya MK, Kumar VG, Sejian V, Bagath M, Krishnan G, Bhatta R. 2018.

- 775 Toll-like receptors: significance, ligands, signaling pathways, and functions in  
776 mammals. *Int Rev Immunol* 37:20-36.
- 777 91. Hsieh YH, Deng JS, Chang YS, Huang GJ. 2018. Ginsenoside Rh2  
778 ameliorates lipopolysaccharide-induced acute lung injury by regulating the  
779 TLR4/PI3K/Akt/mTOR, Raf-1/MEK/ERK, and Keap1/Nrf2/HO-1 signaling  
780 pathways in mice. *Nutrients* 10:1208.
- 781 92. Liu HT, Li WM, Li XY, Xu QS, Liu QS, Bai XF, Yu C, Du YG. 2010.  
782 Chitosan oligosaccharides inhibit the expression of interleukin-6 in  
783 lipopolysaccharide-induced human umbilical vein endothelial cells through  
784 p38 and ERK1/2 protein kinases. *Basic Clin Pharmacol Toxicol* 106:362-371.
- 785 93. Sulistyowati E, Lee MY, Wu LC, Hsu JH, Dai ZK, Wu BN, Lin MC, Yeh JL.  
786 2018. Exogenous heat shock cognate protein 70 suppresses LPS-induced  
787 inflammation by down-regulating NF-kappaB through MAPK and MMP-2/-9  
788 pathways in macrophages. *Molecules* 23:2124.
- 789 94. Li ST, Dai Q, Zhang SX, Liu YJ, Yu QQ, Tan F, Lu SH, Wang Q, Chen JW,  
790 Huang HQ, Liu PQ, Li M. 2018. Ulinastatin attenuates LPS-induced  
791 inflammation in mouse macrophage RAW264.7 cells by inhibiting the  
792 JNK/NF-kappaB signaling pathway and activating the PI3K/Akt/Nrf2 pathway.  
793 *Acta Pharmacol Sin* 39:1294-1304.
- 794 95. Hwangbo C, Lee HS, Park J, Choe J, Lee JH. 2009. The anti-inflammatory  
795 effect of tussilagone, from *Tussilago farfara*, is mediated by the induction of  
796 heme oxygenase-1 in murine macrophages. *Int Immunopharmacol*

- 797 9:1578-1584.
- 798 96. Jaramillo MC, Zhang DD. 2013. The emerging role of the Nrf2-Keap1  
799 signaling pathway in cancer. *Genes Dev* 27:2179-2191.
- 800 97. Zhao M, Chen J, Zhu P, Fujino M, Takahara T, Toyama S, Tomita A, Zhao L,  
801 Yang Z, Hei M, Zhong L, Zhuang J, Kimura S, Li XK. 2015.  
802 Dihydroquercetin (DHQ) ameliorated concanavalin A-induced mouse  
803 experimental fulminant hepatitis and enhanced HO-1 expression through  
804 MAPK/Nrf2 antioxidant pathway in RAW cells. *Int Immunopharmacol*  
805 28:938-944.
- 806 98. Park EJ, Kim YM, Park SW, Kim HJ, Lee JH, Lee DU, Chang KC. 2013.  
807 Induction of HO-1 through p38 MAPK/Nrf2 signaling pathway by ethanol  
808 extract of *Inula helenium* L. reduces inflammation in LPS-activated RAW  
809 264.7 cells and CLP-induced septic mice. *Food Chem Toxicol* 55:386-395.
- 810 99. Wang XF, Li QZ, Bao TW, Cong WR, Song WX, Zhou XW. 2013. *In vitro*  
811 rapid evolution of fungal immunomodulatory proteins by DNA family  
812 shuffling. *Appl Microbiol Biotechnol* 97:2455-2465.
- 813 100. Zhou X, Li Q, Zhao J, Tang K, Lin J, Yin Y. 2007. Comparison of rapid DNA  
814 extraction methods applied to PCR identification of medicinal mushroom  
815 *Ganoderma* spp. *Prep Biochem Biotechnol* 37:369-380.
- 816 101. Li QZ, Wang XF, Bao TW, Ran L, Lin J, Zhou XW. 2010. *In vitro* synthesis of  
817 a recombinant fungal immunomodulatory protein from Lingzhi or Reishi  
818 medicinal mushroom, *Ganoderma lucidum*. *Int J Med Mushrooms*

819 12:347-358.

820 102. Ma G, Chong L, Li Z, Cheung AH, Tattersall MH. 2009. Anticancer activities  
821 of sesquiterpene lactones from *Cyathocline purpurea in vitro*. *Cancer*  
822 *Chemother Pharmacol* 64:143-152.

823

824 ***Figure legends***

825 FIG 1 Production of rFIP-glu in *P. pastoris* GS115 cells. A, schematic map of the  
826 recombinant expression vector pPIC9K-glu-His. B, rFIP-glu detected by  
827 SDS-PAGE. C, Western blot analysis of rFIP-glu using anti-6×His tag. D,  
828 Western blot analysis of rFIP-glu using anti-rFIP-glu. Lane M: protein molecular  
829 mass marker. Lane 1, *P. pastoris* GS115 cells without being induced by MeOH.  
830 Lane 2, *P. pastoris* GS115 cells induced by MeOH. Lane 3, *P. pastoris* GS115  
831 cells containing expression vector pPIC9K without being induced by MeOH.  
832 Lane 4, *P. pastoris* GS115 cells containing expression vector pPIC9K induced by  
833 MeOH. Lane 5, *P. pastoris* GS115 cells containing expression vector  
834 pPIC9K-glu-His without being induced by MeOH. Lane 6, *P. pastoris* GS115  
835 cells containing expression vector pPIC9K-glu-His induced by MeOH.

836 FIG 2 Effect of rFIP-glu on the viability of RAW264.7 cells. RAW264.7 cells were  
837 treated with different concentration of rFIP-glu (1, 2, 4, 8, 16 and 32 µg/mL) or  
838 PBS (as control), Concanavalin A (ConA) and lipopolysaccharide (LPS) for 24 h.  
839 The cells were measured by methylene blue uptake assay. Data were expressed  
840 as means ± SD (n = 5). ns,  $p > 0.05$ ; \*\*,  $p \leq 0.01$ ; \*\*\*\*,  $p \leq 0.0001$  versus

841 control group.

842 FIG 3 Effects of rFIP-glu on RAW264.7 cells phagocytosis. RAW264.7 cells were  
843 treated with different concentration of rFIP-glu (1, 2, 4 and 8  $\mu\text{g}/\text{mL}$ ). Control  
844 cells were treated with PBS only and ConA cells as positive control were treated  
845 with 5  $\mu\text{g}/\text{mL}$ . The effects were assessed by neutral red uptake assay. Data were  
846 expressed as means  $\pm$  SD (n = 3). \*,  $p \leq 0.05$  versus control group.

847 FIG 4 Effects of rFIP-glu on RAW264.7 cells. The cells were treated with different  
848 concentration of rFIP-glu (1, 2, 4 and 8  $\mu\text{g}/\text{mL}$ ) for 6 h. The mRNA expression  
849 of TNF- $\alpha$  (A), Arginase II (B), iNOS (C), MCP-1 (CCL-2) (D), IL-10 (E),  
850 CXCL-10 (F) and IL-6 (G) was measured by qRT-PCR. Data were expressed as  
851 means  $\pm$  SD (n = 3). ns,  $p > 0.05$ ; \*\*,  $p \leq 0.01$ ; \*\*\*,  $p \leq 0.001$ ; \*\*\*\*,  $p \leq 0.0001$   
852 versus control group.

853 FIG 5 Effects of rFIP-glu on LPS-induced RAW264.7 cells. Cells were treated with  
854 different concentration of rFIP-glu (1, 2, 4 and 8  $\mu\text{g}/\text{mL}$ ) and LPS (1  $\mu\text{g}/\text{mL}$ ) and  
855 incubated for 6 h. The mRNA expression of TNF- $\alpha$  (A), MCP-1 (CCL-2) (B),  
856 Arginase II (C), IL-10 (D), IL-1 $\beta$  (E), IL-6 (F) and CXCL-10 (G) was measured  
857 by qRT-PCR. Data were expressed as means  $\pm$  SD (n = 3). #####,  $p \leq 0.0001$   
858 versus control group. ns,  $p > 0.05$ ; \*\*,  $p \leq 0.01$ ; \*\*\*,  $p \leq 0.001$ ; \*\*\*\*,  $p \leq 0.0001$   
859 versus LPS group. The content of NO (H) in cell supernatant was determined by  
860 Griess assay. Values are means  $\pm$  SD (n = 5). #####,  $p \leq 0.0001$  versus control  
861 group. \*\*,  $p \leq 0.01$ ; \*\*\*\*,  $p \leq 0.0001$  versus LPS group.

862 FIG 6 RNA-seq analysis of macrophage RAW264.7 cells. (A) Principle component

863 analysis of RAW264.7 cells treated with and without rFIP-glu. (B) Heatmap of  
864 RAW264.7 cells treated with and without rFIP-glu. (C) Scatter plots of  
865 differentially expressed genes between PBS- and rFIP-glu-treated macrophages.  
866 Up-regulated genes are depicted in red and down-regulated gene in green (FDR  
867  $\leq 0.001$ , fold change  $> 1$ ). (D) GO analysis of the differentially expressed genes.  
868 (E) GO enrichment analysis of the differentially expressed genes. (F) KEGG  
869 pathway enrichment analysis of the differentially expressed genes. (G)  
870 Confirmation of RNA-seq results by qRT-PCR.

871 FIG 7 Effect of rFIP-glu on signaling pathways. RAW264.7 cells were pre-treated  
872 with 50  $\mu\text{M}$  of LY294002 for 30 min and then treated with 4  $\mu\text{g/ml}$  of rFIP-glu  
873 for 6 h. The mRNA expression of MCP-1 (CCL-2) (A) and TNF- $\alpha$  (B) was  
874 measured by qRT-PCR. RAW264.7 cells were pre-treated with 20  $\mu\text{M}$  of U0126,  
875 30  $\mu\text{M}$  of SP600125 or 10  $\mu\text{M}$  of SB203580 for 30 min and then treated with 4  
876  $\mu\text{g/ml}$  of rFIP-glu for 6 h. The mRNA expression of TNF- $\alpha$  (D), MCP-1 (CCL-2)  
877 (E) and iNOS (F) was measured by qRT-PCR. Data were expressed as means  $\pm$   
878 SD (n = 3). #####,  $p \leq 0.0001$  versus control group. \*\*\*,  $p \leq 0.001$ ; \*\*\*\*,  $p \leq$   
879 0.0001 versus rFIP-glu group.

880 FIG 8 Possible immunomodulatory signaling mechanism of rFIP-glu in RAW264.7  
881 macrophages.

882

### 883 *Supplementary legends*

884 FIG S1 The effect of rFIP-glu on morphological changes of RAW264.7 cells.



885 RAW264.6 cells were incubated with LPS, rFIP-glu or both for 6 h. Cells were  
886 subjected to microscopic analysis (200×). All experiments were performed in  
887 duplicates. The data from one representative experiment out of two independent  
888 experiments were shown. Bar is 50 μm. A, untreated cells. Untreated RAW 264.7  
889 cells as control exhibited a round morphology. B, LPS-treated cells. LPS-treated  
890 RAW 264.7 cells exhibited changes of morphology including pseudopodia  
891 formation and cell spreading. C, rFIP-glu-treated cells. After stimulated by  
892 rFIP-glu, the volume of RAW 264.7 cells increased and agglutination happened.  
893 D, rFIP-glu and LPS-stimulated cells. rFIP-glu treatment reversed morphology  
894 change in LPS-stimulated RAW 264.7 cells, with increase in volume and  
895 agglutination.

896 FIG S2 Heatmap of Toll-like receptors pathway in RAW264.7 cells treated with and  
897 without rFIP-glu. RAW264.7 cells were treated with 4 μg/mL of rFIP-glu for 6 h.

898 FIG S3 Heatmap of MAPK receptors pathway in RAW264.7 cells treated with and  
899 without rFIP-glu. RAW264.7 cells were treated with 4 μg/mL of rFIP-glu for 6 h.

900 FIG S4 Heatmap of FcγR-mediated phagocytosis pathway in RAW264.7 cells treated  
901 with and without rFIP-glu. RAW264.7 cells were treated with 4 μg/mL of  
902 rFIP-glu for 6 h.

903 FIG S5 Effects of rFIP-glu on the mRNA level of TLR4 in RAW264.7 cells. The cells  
904 were treated with 4 μg/mL of rFIP-glu for 6 h. The mRNA expression of TLR4  
905 was measured by qRT-PCR.

906 FIG S6 Effects of rFIP-glu on the mRNA level of HO-1 in RAW264.7 cells. The cells

907 were treated with different concentrations of rFIP-glu (1, 2, 4 and 8  $\mu\text{g}/\text{mL}$ ) for 6  
908 h. The mRNA expression of HO-1 was measured by qRT-PCR. Data were  
909 expressed as means  $\pm$  SD (n = 3). \*\*\*,  $p \leq 0.0001$  versus control group.

910 TABLE S1 Primers used in this study.

911

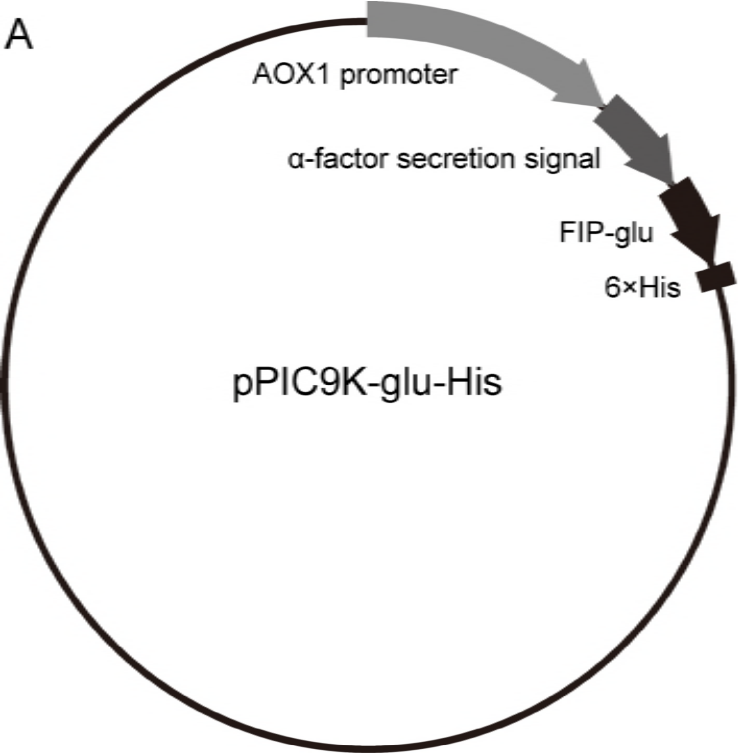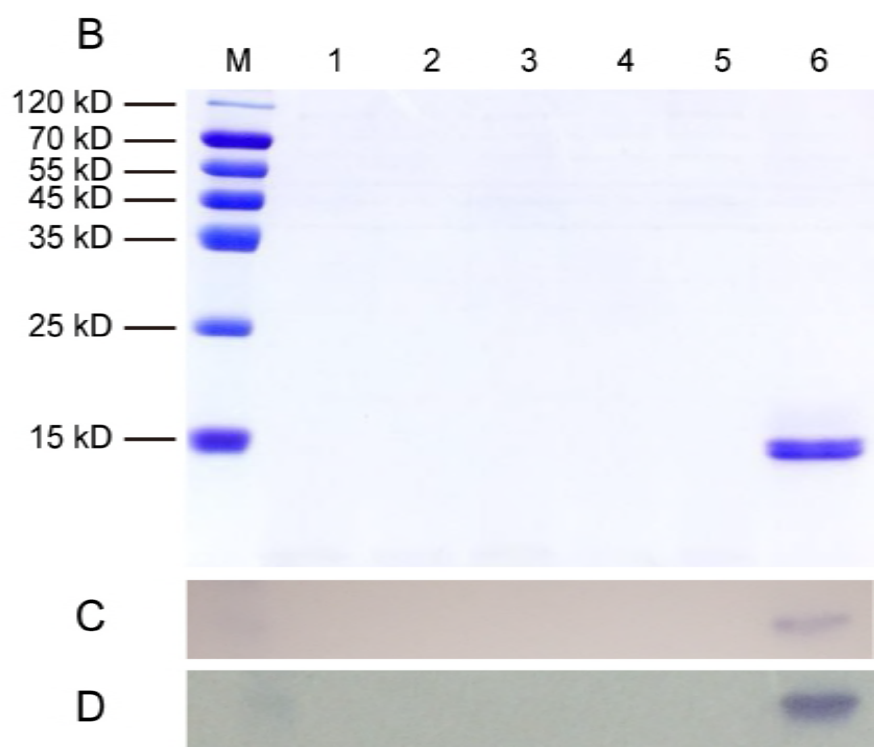

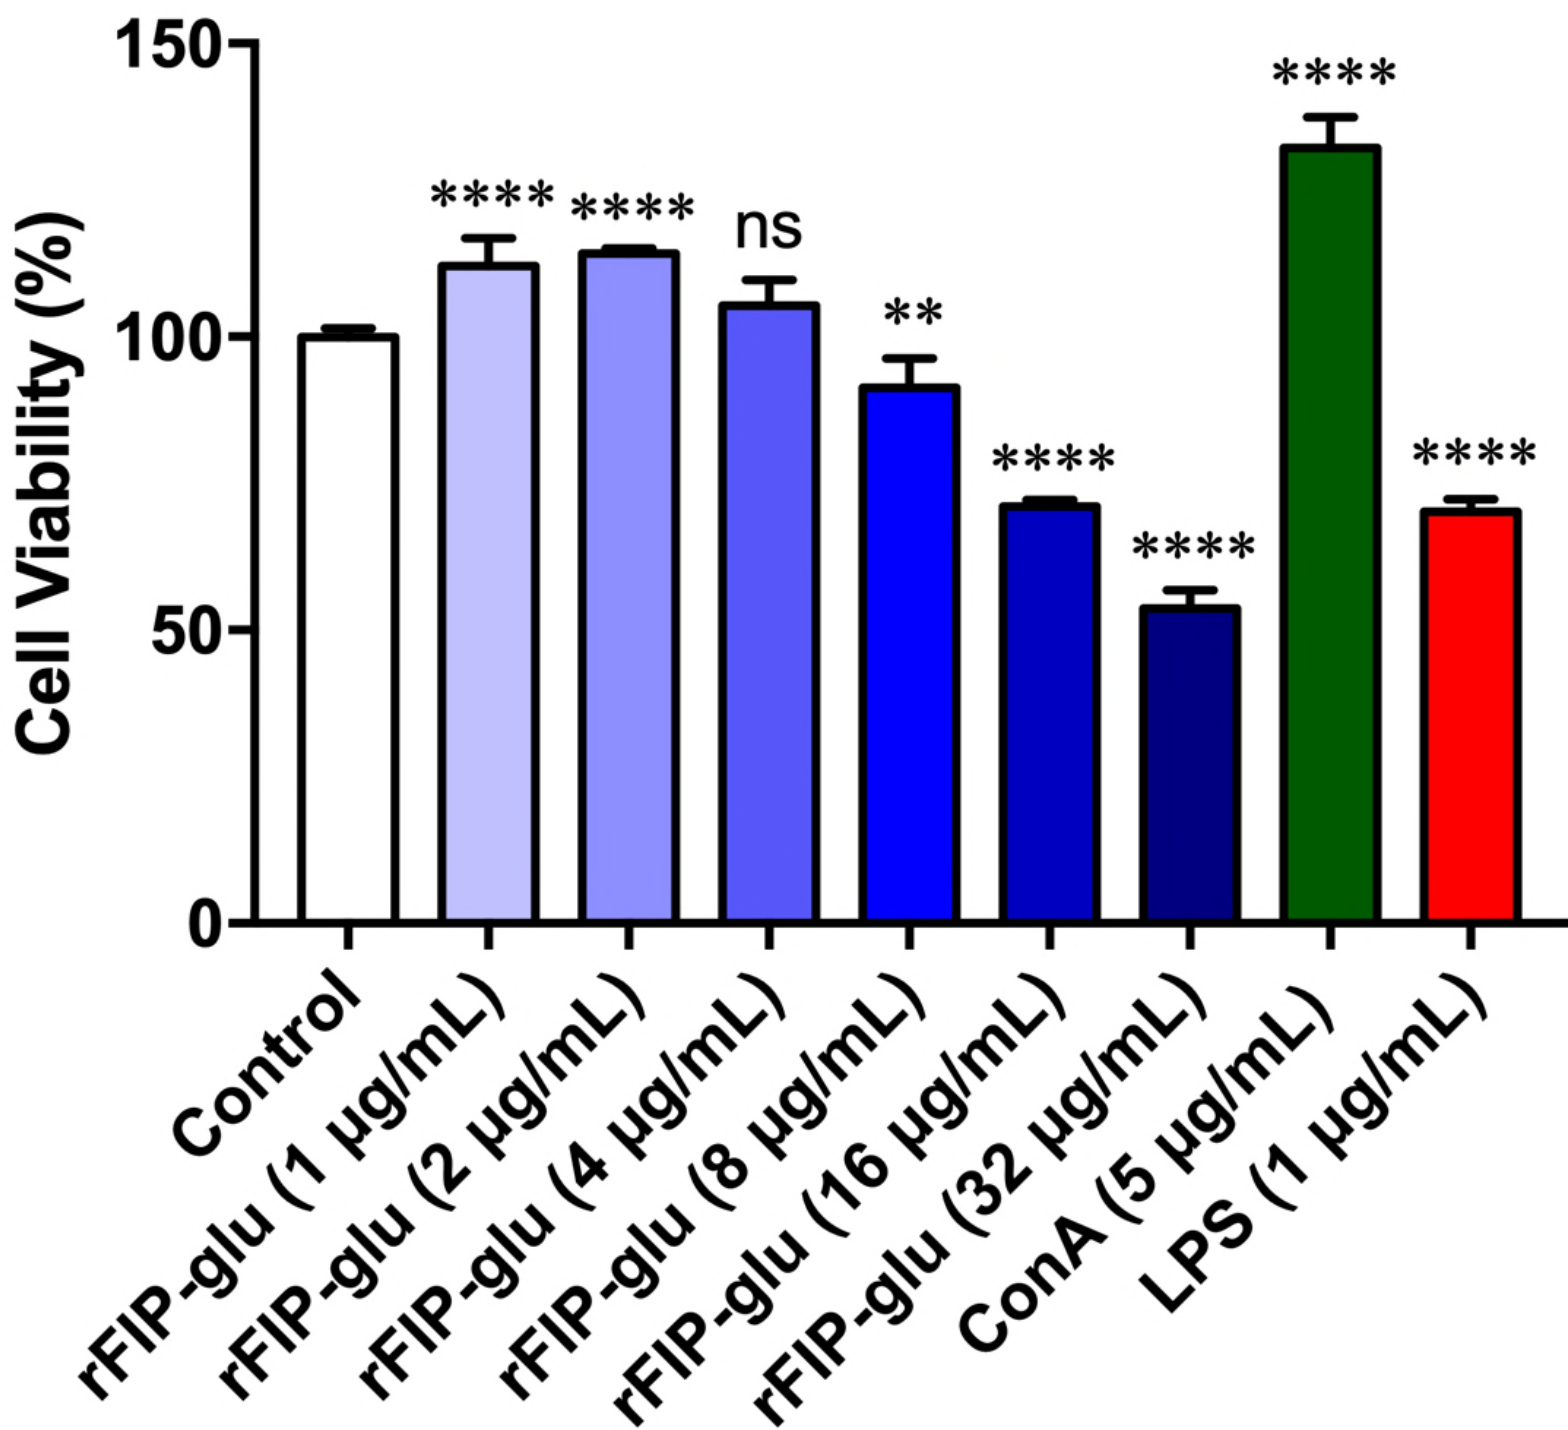

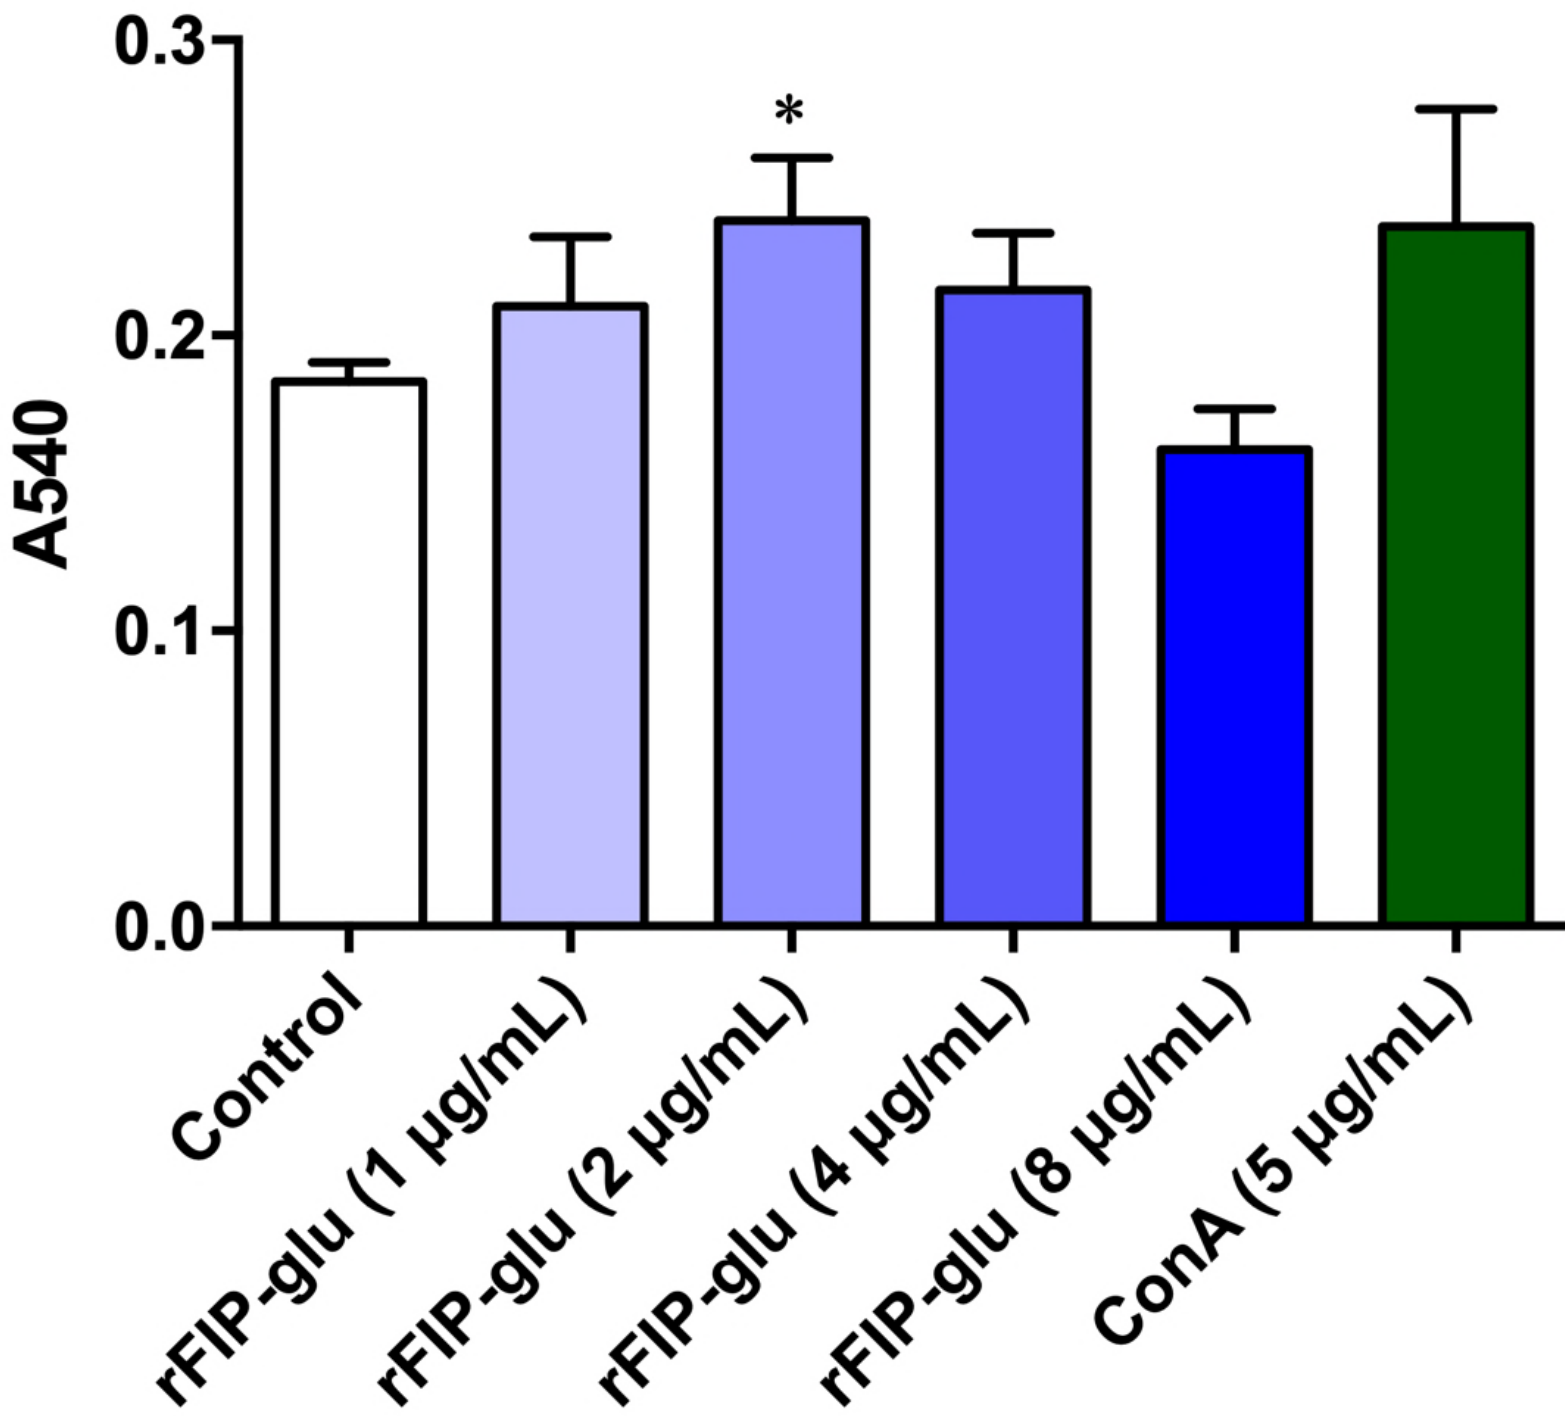

**A**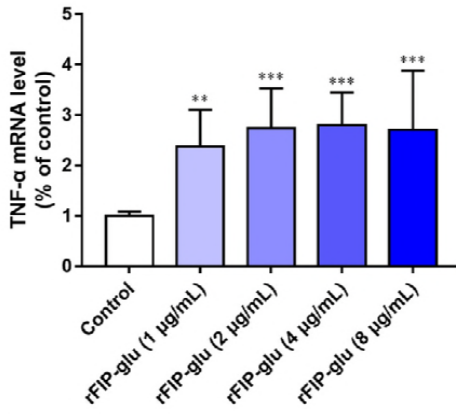**B**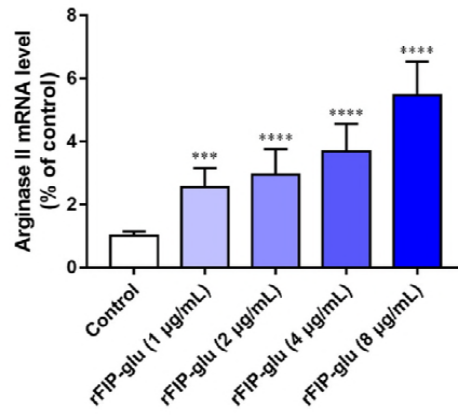**C**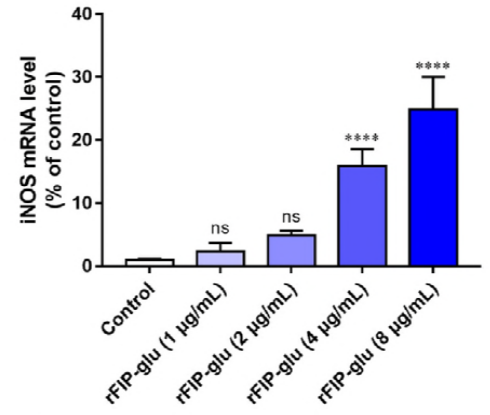**D**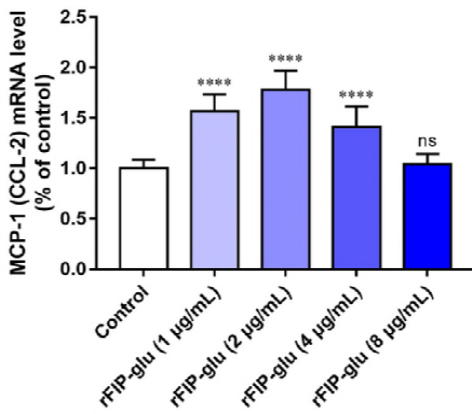**E**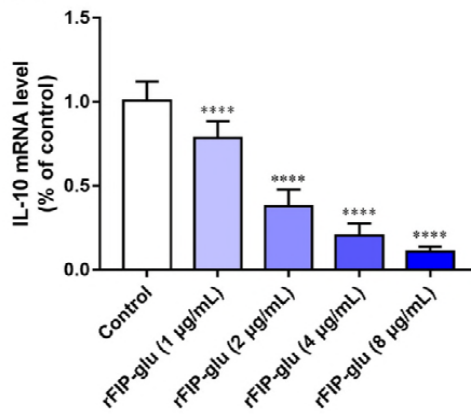**F**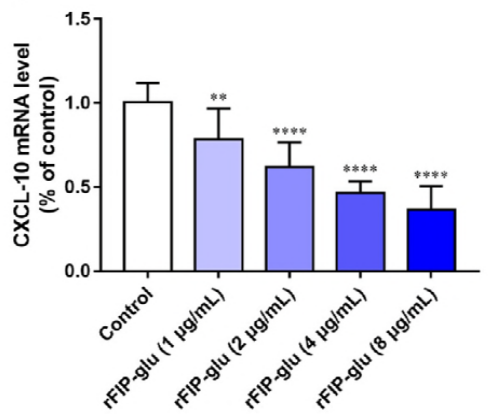**G**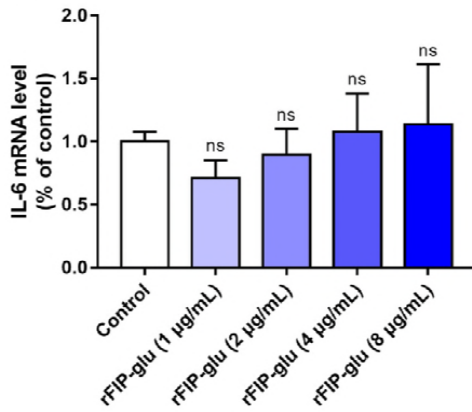

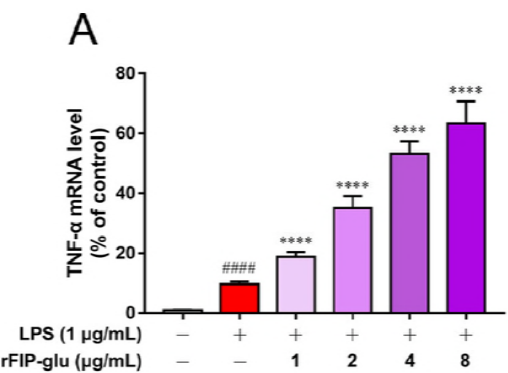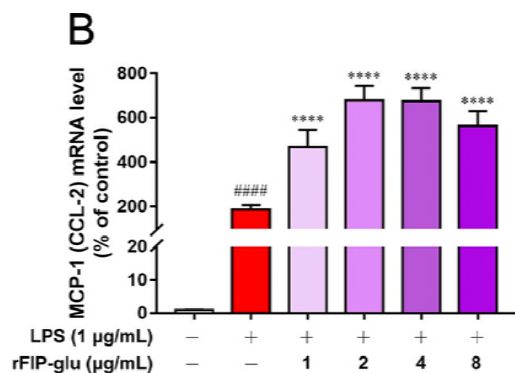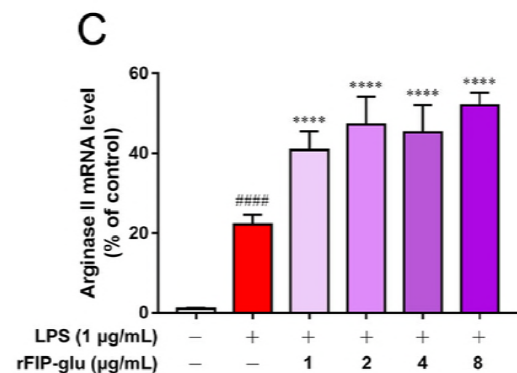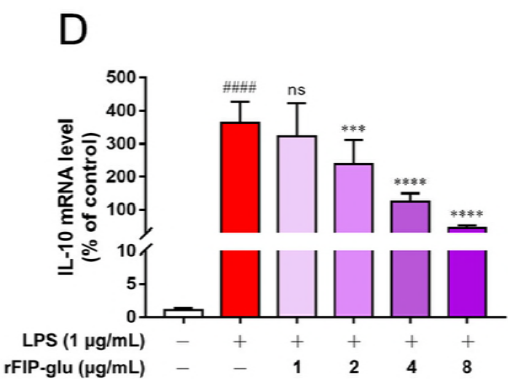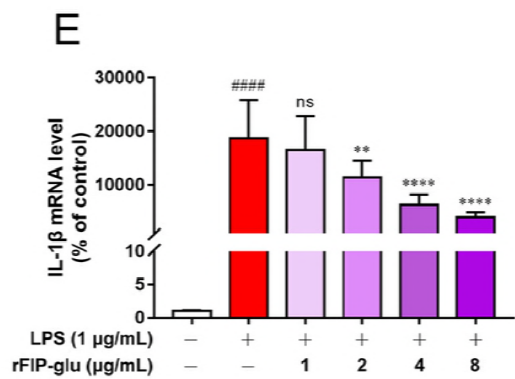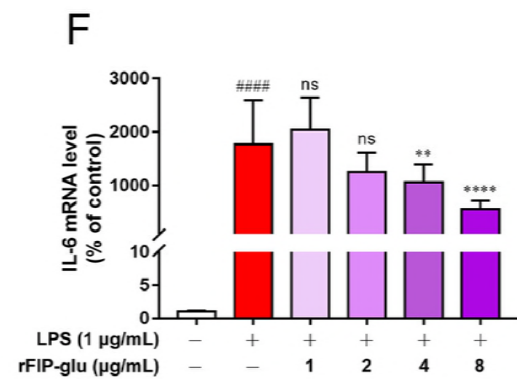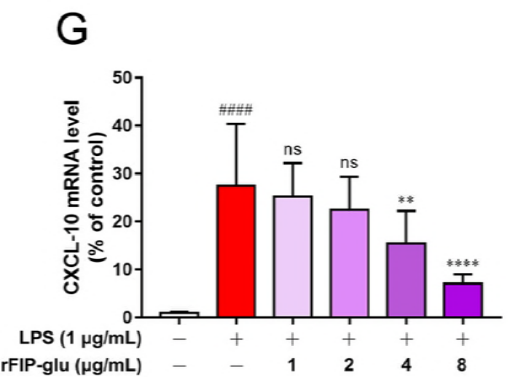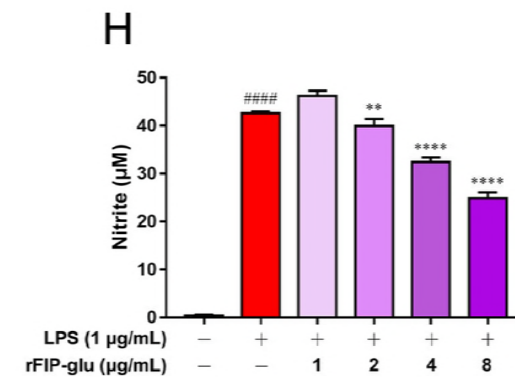

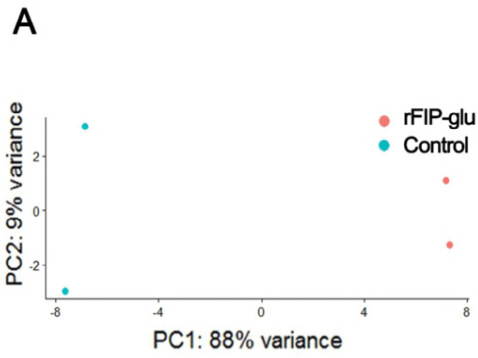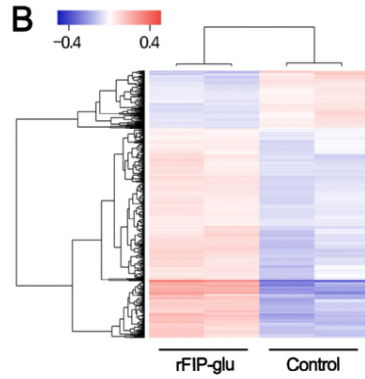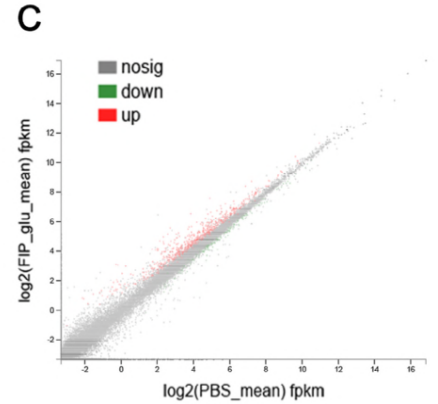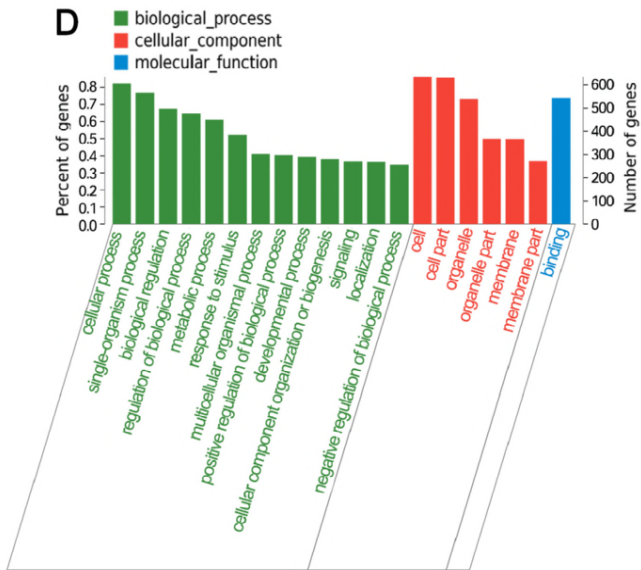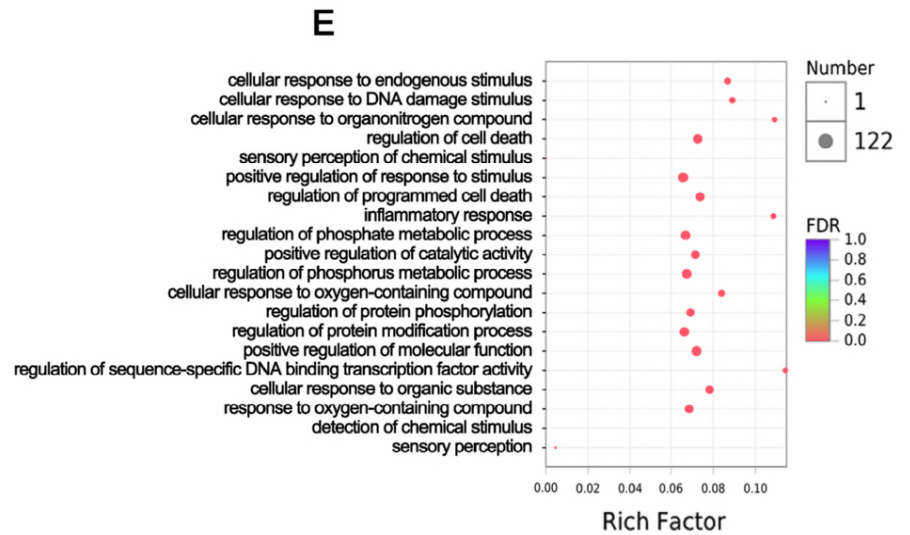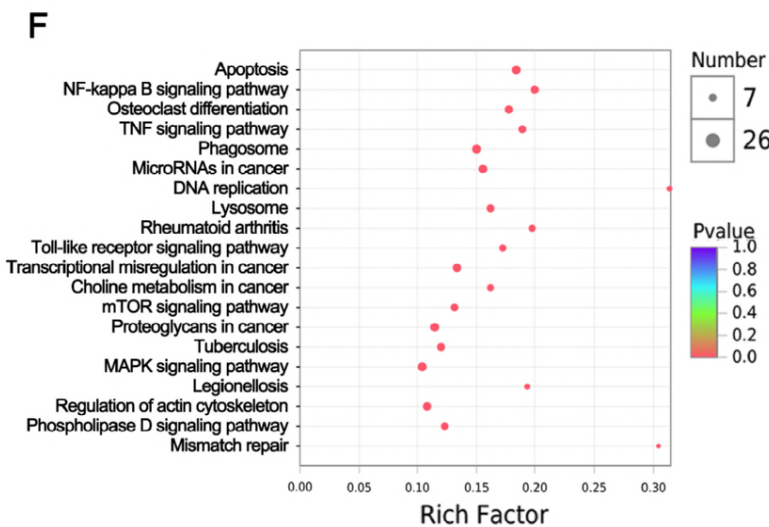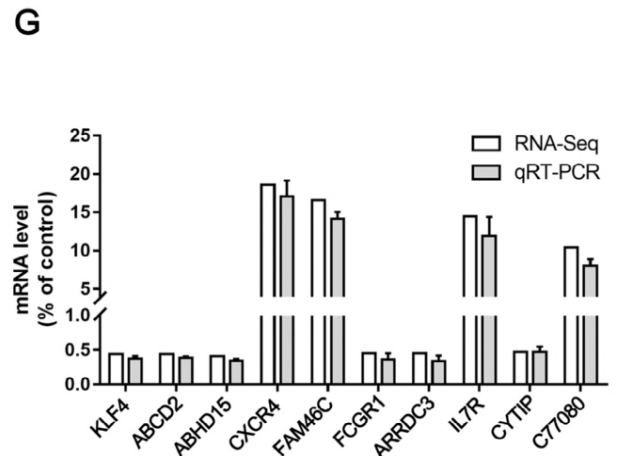



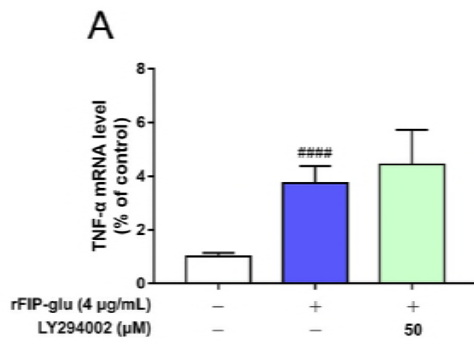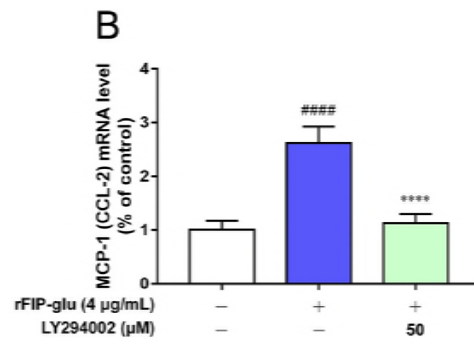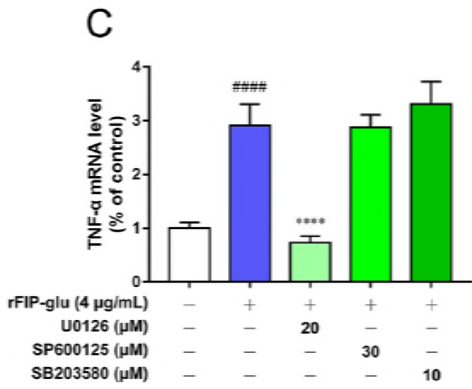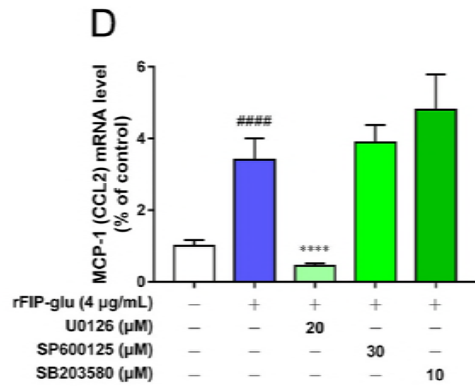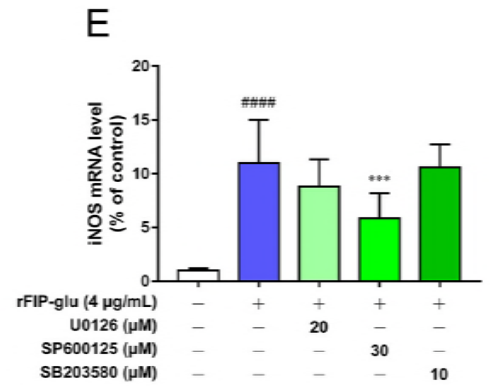

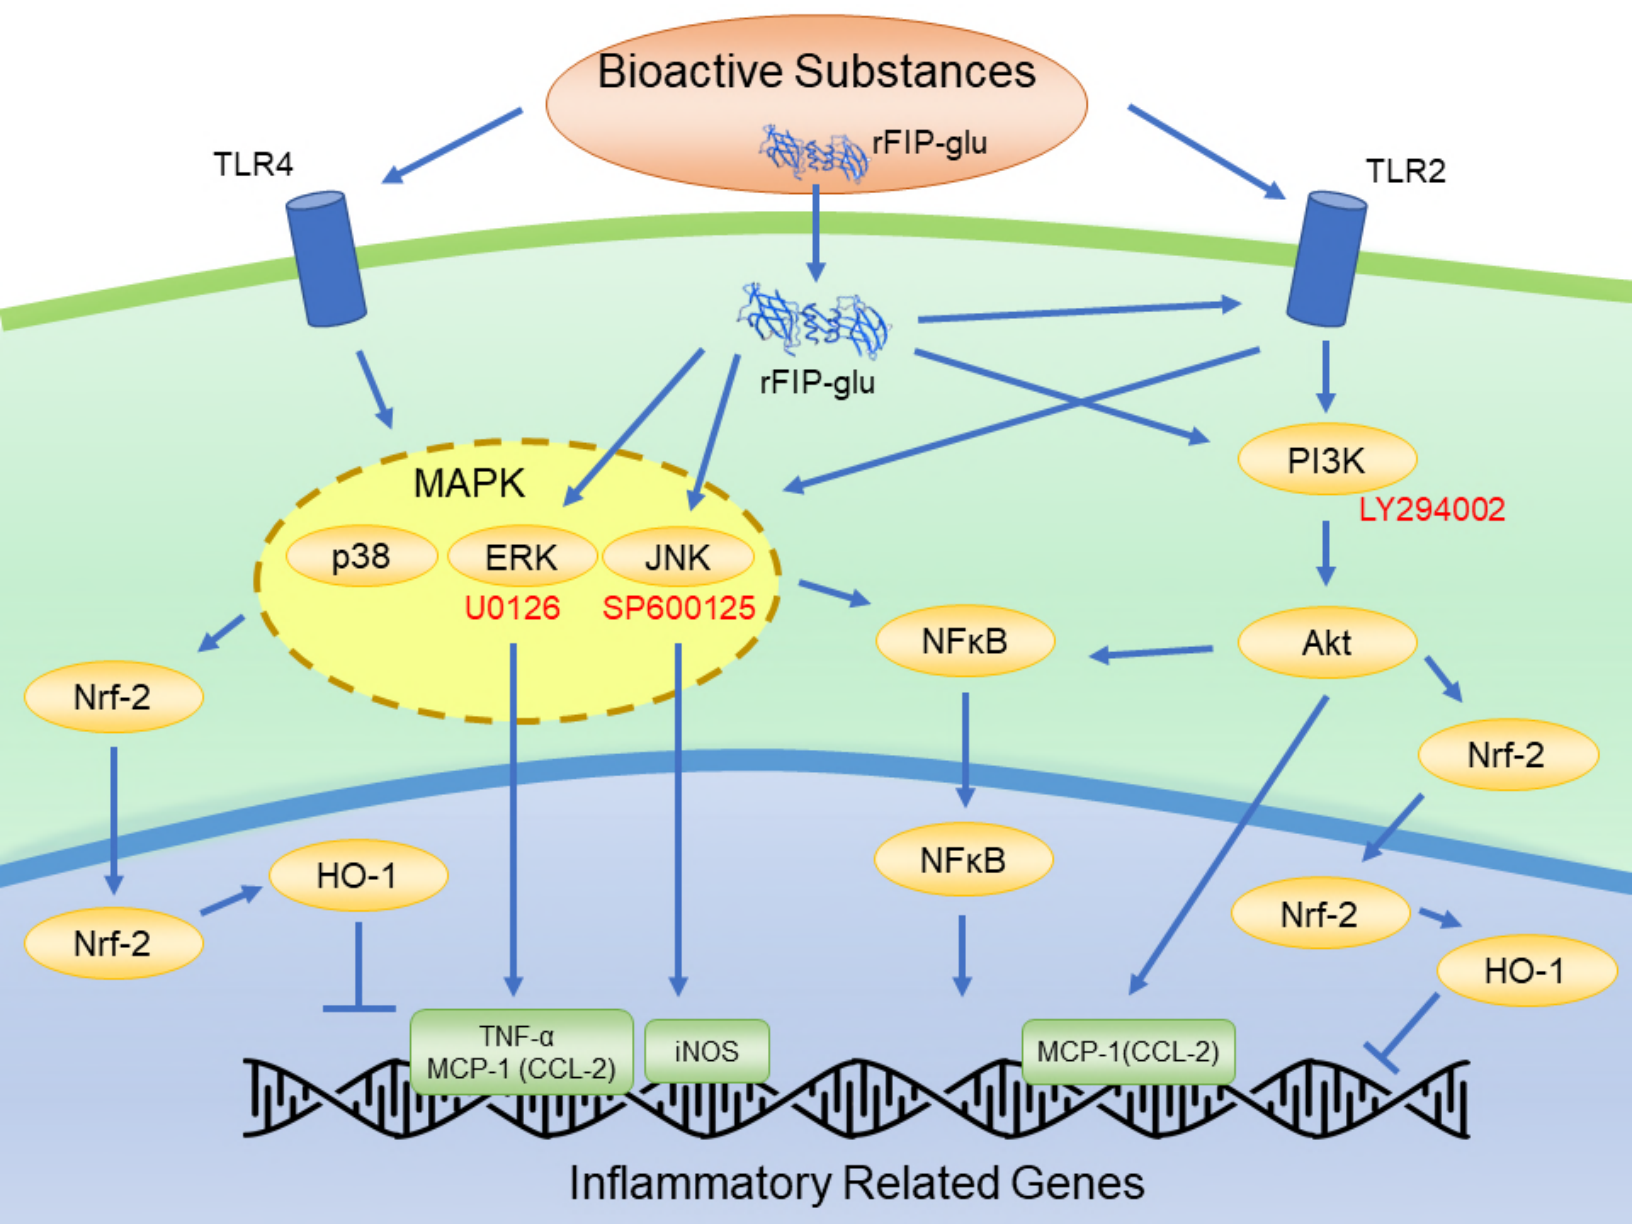

Source: https://www.biorxiv.org/content/10.1101/499871v1.full.pdf
